# Supplementary material for: Asymmetric 1,3-dipolar cycloaddition reactions between enals and nitrones catalysed by half-sandwich rhodium or iridium diphosphane complexes
Source: Royal Society of Chemistry journal article supplement (doi:10.1039/c4cy01533a), 2015-01-01
Supplement: c4cy01533a1.pdf [file c4cy01533a1.pdf]

## Supplementary Information

### Asymmetric 1,3-Dipolar Cycloaddition Reactions between Enals and Nitrones Catalysed by Half-Sandwich Rhodium or Iridium Diphosphane Complexes

Ainara Asenjo, Fernando Viguri\*, M. Pilar Lamata, Ricardo Rodríguez, María Carmona  
Luis A. Oro and Daniel Carmona\*

*Instituto de Síntesis Química y Catálisis Homogénea (ISQCH), CSIC - Universidad de  
Zaragoza, Departamento de Catálisis y Procesos Catalíticos, Pedro Cerbuna 12, 50009  
Zaragoza, Spain*

| Table of Contents                                                                | page |
|----------------------------------------------------------------------------------|------|
| 1. General Remarks                                                               | 2    |
| 2. Starting Materials                                                            | 2    |
| 3. Analytical Data for the 1,3-Dipolar Cycloaddition Products                    | 2    |
| 4. References                                                                    | 10   |
| 5. $^1\text{H}$ and $^{13}\text{C}$ NMR Spectra and Chromatograms of the Adducts | 11   |

## 1. General Remarks

All solvents were dried over appropriate drying agents, distilled under argon and degassed prior to use. All preparations have been carried out under argon.  $^1\text{H}$  and  $^{13}\text{C}$  NMR spectra were recorded on a Bruker AV-300 spectrometer (300.13 MHz), Bruker AV-400 (400.16 MHz) or a Bruker AV-500 (500.13 MHz). Chemical shifts are expressed in ppm upfield from  $\text{SiMe}_4$ . Analytical HPLC was performed on an Alliance Waters (Waters 2996 PDA detector) instrument using a chiral column Daicel Chiralcel OD-H (0.46 cm  $\times$  25 cm) or Chiralpak AD-H (0.46 cm  $\times$  25 cm).

## 2. Starting Materials

The stereochemical purity of the enals was tested by NMR, after distillation under argon: methacrolein 95.5%, acrolein 99.9%, *trans*-crotonaldehyde 97.6% and *trans*-2-methyl-2-butenal 99.2%. The nitrones **Ia-e**,  $^1\text{II}^2$ ,  $\text{III}^3$ ,  $\text{IV}^3$ ,  $\text{V}^3$ , and the complexes  $[(\eta^5\text{-C}_5\text{Me}_5)\text{M}(\text{PP}^*)(\text{H}_2\text{O})][\text{SbF}_6]_2$  (**1-10**) were prepared according to literature procedures.<sup>4</sup>

## 3. Analytical Data for 1,3-Dipolar Cycloaddition Products

(*3R,4R*)-*endo*-4-methyl-2-*N,3*-diphenylisoxazolidine-4-carbaldehyde<sup>5a,6a</sup> (Table 1, Entries 1-10)

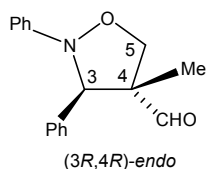

$^1\text{H}$  RMN (400.16 MHz,  $\text{CDCl}_3$ , 25  $^\circ\text{C}$ ):  $\delta$  = 9.20 (s, 1H, CHO), 7.5-6.8 (m, 10H,  $\text{H}_{\text{Ar}}$ ), 4.90 (s, 1H,  $\text{H}_3$ ), 3.97 (d,  $J$  = 8.9 Hz, 1H,  $\text{H}_5$ ), 3.56 (d,  $J$  = 8.9 Hz, 1H,  $\text{H}_5$ ), 0.92 ppm (s, 3H, Me).  $^{13}\text{C}$  RMN (100.62 MHz  $\text{CDCl}_3$ , 25  $^\circ\text{C}$ ):  $\delta$  = 200.37 (CHO), 150-114 (12C,  $\text{C}^{\text{Ar}}$ ), 73.19 ( $\text{C}^5$ ), 72.48 ( $\text{C}^3$ ), 63.11 ( $\text{C}^4$ ), 15.49 ppm (Me). Enantiomeric excess was determined by  $^1\text{H}$  NMR after the *in situ* formation of diastereomeric imines with (*R*)-(+)- $\alpha$ -methylbenzylamine (99%, Fluka).  $^1\text{H}$  NMR (400.16 MHz,  $\text{C}_6\text{D}_6$ , RT): major isomer  $\delta$  = 5.07 (s, O-N- $\text{C}^3\text{H}$ ), minor isomer  $\delta$  = 5.03 ppm (s, O-N- $\text{C}^3\text{H}$ ).

**(3,5)-endo-4-methyl-2-*N*,3-diphenylisoxazolidine-4-carbaldehyde<sup>5a,6a</sup> (Table 1, Entries 1-10)**

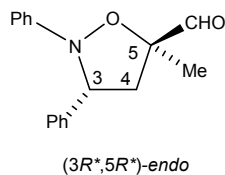

<sup>1</sup>H RMN (400.16 MHz, CDCl<sub>3</sub>, 25 °C):  $\delta$  = 9.58 (d,  $J$  = 1.0 Hz, 1H, CHO), 7.5-6.8 (m, 10H, H<sub>Ar</sub>), 4.61 (pt,  $J$  = 7.6 Hz, 1H, H<sub>3</sub>), 3.04 (dd,  $J$  = 12.7, 7.6 Hz, 1H, H<sub>4</sub>), 1.94 (dd,  $J$  = 12.7, 7.6 Hz, 1H, H<sub>4</sub>), 1.16 ppm (s, 3H, Me). <sup>13</sup>C RMN (100.62 MHz CDCl<sub>3</sub>, 25 °C):  $\delta$  = 201.37 (CHO), 150-114 (12C, C<sup>Ar</sup>), 87.20 (C<sup>5</sup>), 68.63 (C<sup>3</sup>), 44.25 (C<sup>4</sup>), 18.82 ppm (Me). Enantiomeric excess was determined by <sup>1</sup>H NMR after the *in situ* formation of diastereomeric imines with (*R*)-(+)- $\alpha$ -methylbenzylamine (99%, Fluka). <sup>1</sup>H NMR (400.16 MHz, C<sub>6</sub>D<sub>6</sub>, RT): major isomer  $\delta$  = 4.84 (pt, O-N-C<sup>3</sup>H), minor isomer  $\delta$  = 5.16 ppm (pt, O-N-C<sup>3</sup>H).

**(3*S*,5*R*)-endo-2-methyl-1,5,6,10*b*-tetrahydro-2*H*-isoxazolo[3,2*a*]isoquinoline-2-carbaldehyde<sup>5a</sup> (Table 1, Entries 11-20)**

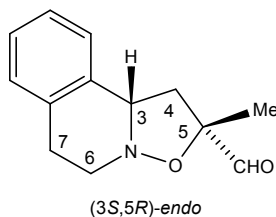

The oily residue was purified by column chromatography over silica gel with hexane/AcOEt (7/3, v/v) to provide the title compound as an oil. <sup>1</sup>H NMR (400.16 MHz, CD<sub>2</sub>Cl<sub>2</sub>, 25 °C):  $\delta$  = 9.51 (s, 1H, CHO), 7.1-6.9 (m, 4H, H<sub>Ar</sub>), 4.62 (m, 1H, H<sub>3</sub>), 3.21-2.84 (m, 2H, H<sub>6</sub>), 2.94-2.74 (m, 2H, H<sub>7</sub>), 2.48 (pt,  $J$  = 11.3 Hz, 1H, H<sub>4</sub>), 2.35 (dd,  $J$  = 11.3, 7.0 Hz, 1H, H<sub>4</sub>), 1.32 ppm (s, 3H, Me). <sup>13</sup>C NMR (100.62 MHz C<sub>6</sub>D<sub>6</sub>, 25 °C):  $\delta$  = 200.78 (CHO), 134.8-126.73 (6C, C<sup>Ar</sup>), 87.85 (C<sup>5</sup>), 63.77 (C<sup>3</sup>), 50.02 (C<sup>6</sup>), 43.82 (C<sup>4</sup>), 29.02 (C<sup>7</sup>), 21.30 ppm (Me). Enantiomeric excess of the adduct was checked by <sup>1</sup>H NMR with the use of the chiral shift reagent Eu(hfc)<sub>3</sub>. <sup>1</sup>H NMR (400.16 MHz, C<sub>6</sub>D<sub>6</sub>, 25 °C): major isomer  $\delta$  = 14.87 (s, CHO), minor isomer  $\delta$  = 14.63 ppm (s, CHO).

**(3,5)-endo-5-methyl-2-N-methyl-3-phenylisoxazolidin-5-carbaldehyde<sup>5d,6a</sup> (Table 2, Entries 1-4)**

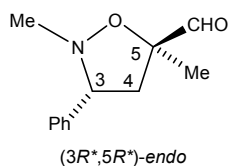

The oily residue was purified by column chromatography over silica gel with hexane/AcOEt (7/3, v/v) to provide the title compound as an oil. <sup>1</sup>H NMR (400.16 MHz, CD<sub>2</sub>Cl<sub>2</sub>, 25 °C):  $\delta$  = 9.55 (s, 1H, CHO), 7.3-7.1 (m, 5H, H<sub>Ar</sub>), 3.58 (m, 1H, H<sub>3</sub>), 2.84 (dd,  $J$  = 12.6, 7.1 Hz, 1H, H<sub>4</sub>), 2.48 (s, 3H, NMe), 2.14 (dd,  $J$  = 12.6, 9.1 Hz, 1H, H<sub>4</sub>), 1.34 ppm (s, 3H, Me). <sup>13</sup>C NMR (100.62 MHz CD<sub>2</sub>Cl<sub>2</sub>, 25 °C):  $\delta$  = 201.14 (CHO), 128 (6C, C<sub>Ar</sub>), 85.11 (C<sup>5</sup>), 73.58 (C<sup>3</sup>), 48.00 (C<sup>4</sup>), 43.73 (NMe), 21.19 ppm (Me). Enantiomeric excess was determined by <sup>1</sup>H NMR after the *in situ* formation of diastereomeric imines with (*R*)-(+)- $\alpha$ -methylbenzylamine (99%, Fluka). <sup>1</sup>H NMR (400.16 MHz, C<sub>6</sub>D<sub>6</sub>, RT): major isomer  $\delta$  = 3.07 (t, O-N-C<sup>3</sup>H), minor isomer  $\delta$  = 3.23 ppm (t, O-N-C<sup>3</sup>H).

**(3R,5R)-endo-hexahydropyrrolo[1,2b]isoxazolo-2-carbaldehyde<sup>5a</sup> (Table 2, Entries 5-8)**

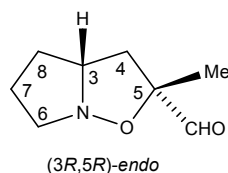

The oily residue was purified by column chromatography over silica gel with hexane/AcOEt (7/3, v/v) to provide the title compound as an oil. <sup>1</sup>H NMR (400.16 MHz, CD<sub>2</sub>Cl<sub>2</sub>, 25 °C):  $\delta$  = 9.55 (s, 1H, CHO), 3.77 (m, 1H, H<sub>3</sub>), 3.15-3.05 (m, 2H, H<sub>6</sub>), 2.28 (d,  $J$  = 6.3 Hz, 2H, H<sub>4</sub>), 1.97 (m, 2H, H<sub>7</sub>, H<sub>8</sub>), 1.72 (m, 1H, H<sub>7</sub>), 1.59 (m, 1H, H<sub>8</sub>) 1.34 ppm (s, 3H, Me). <sup>13</sup>C NMR (100.62 MHz CD<sub>2</sub>Cl<sub>2</sub>, 25 °C):  $\delta$  = 200.55 (CHO), 86.69 (C<sup>5</sup>), 65.98 (C<sup>3</sup>), 56.64 (C<sup>6</sup>), 44.17 (C<sup>4</sup>), 29.92 (C<sup>7</sup>), 23.26 (C<sup>8</sup>), 20.65 ppm (Me). Enantiomeric excess of adduct was checked by <sup>1</sup>H NMR with the use of the chiral shift reagent Eu(hfc)<sub>3</sub> (99%, Aldrich). <sup>1</sup>H NMR (400.16 MHz, C<sub>6</sub>D<sub>6</sub>, 25 °C): major isomer  $\delta$  = 11.30 (s, CHO), minor isomer  $\delta$  = 12.32 ppm (s, CHO).

**(3*R*,5*R*)-endo-hexahydroisoxazolo[2,3*a*]pyridine-2-carbaldehyde<sup>5a</sup> (Table 2, Entries 9-12)**

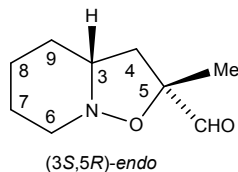

The oily residue was purified by column chromatography over silica gel with Et<sub>2</sub>O/*n*-Pentane/MeOH (30/65/5, v/v/v) to provide the title compound as an oil. <sup>1</sup>H NMR (400.16 MHz, C<sub>6</sub>D<sub>6</sub>, 25 °C):  $\delta$  = 9.73 (s, 1H, CHO), 3.37 (m, 1H, H<sub>6</sub>), 2.32 (m, 1H, H<sub>6</sub>), 2.02 (pt,  $J$  = 11.4 Hz, 1H, H<sub>4</sub>), 1.91 (m, 1H, H<sub>3</sub>), 1.58 (dd,  $J$  = 11.4, 7.9 Hz, 1H, H<sub>4</sub>), 1.44-1.04 (m, 2H, H<sub>9</sub>), 1.34 (m, 2H, H<sub>7</sub>), 1.30-0.85 (m, 2H, H<sub>8</sub>), 1.11 ppm (s, 3H, Me). <sup>13</sup>C NMR (100.62 MHz C<sub>6</sub>D<sub>6</sub>, 25 °C):  $\delta$  = 204.18 (CHO), 83.12 (C<sup>5</sup>), 66.66 (C<sup>3</sup>), 55.17 (C<sup>6</sup>), 42.94 (C<sup>4</sup>), 29.37 (C<sup>9</sup>), 24.75 (C<sup>7</sup>), 23.97 (C<sup>8</sup>), 19.57 ppm (Me). Enantiomeric excess was determined by <sup>1</sup>H NMR after the *in situ* formation of diastereomeric salts with (*S*)-(+)-mandelic acid (99%, Aldrich). <sup>1</sup>H NMR (400.16 MHz, CDCl<sub>3</sub>, 25 °C): major isomer  $\delta$  = 9.60 (s, CHO), minor isomer  $\delta$  = 9.56 ppm (s, CHO).

**Endo-4-methyl-2-*N*-phenyl-3-(4-methoxyphenyl)-isoxazolidine-4-carbaldehyde<sup>5b,c</sup> (Table 2, Entry 13)**

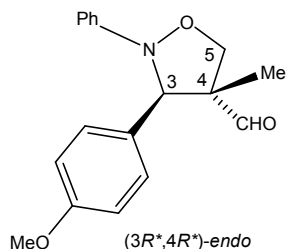

<sup>1</sup>H NMR (400.16 MHz, CDCl<sub>3</sub>, 25 °C):  $\delta$  = 9.66 (s, 1H, CHO), 7.4-6.8 (9H, H<sub>Ar</sub>), 4.88 (s, 1H, H<sub>3</sub>), 4.43 (d,  $J$  = 8.9 Hz, 1H, H<sub>5</sub>), 3.98 (d, 1H, H<sub>5</sub>), 3.82 (s, 3H, OMe), 0.91 ppm (s, 3H, Me). <sup>13</sup>C NMR (100.62 MHz, CDCl<sub>3</sub>, 25 °C):  $\delta$  = 200.63 (s, CHO), 159-114 (12C, C<sup>Ar</sup>), 73.11 (s, C<sup>5</sup>), 72.05 (s, C<sup>3</sup>), 63.02 (s, C<sup>4</sup>), 55.26 (s, OMe), 15.45 ppm (s, Me). Enantiomeric excess was determined by <sup>1</sup>H NMR after the *in situ* formation of diastereomeric imines with (*R*)-(+)- $\alpha$ -methylbenzylamine (99%, Fluka). <sup>1</sup>H NMR (400.16 MHz, C<sub>6</sub>D<sub>6</sub>, RT): major isomer  $\delta$  = 4.93 (s, O-N-C<sup>3</sup>H), minor isomer  $\delta$  = 4.88 ppm (s, O-N-C<sup>3</sup>H).

***Endo*-4-methyl-2-*N*-phenyl-3-(4-methylphenyl)-isoxazolidine-4-carbaldehyde<sup>5b,c</sup>**  
**(Table 2, Entry 14)**

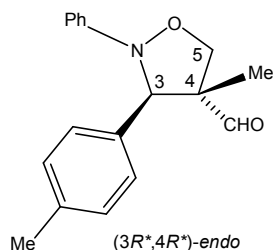

<sup>1</sup>H NMR (400.16 MHz, CDCl<sub>3</sub>, 25 °C):  $\delta$  = 9.69 (s, 1H, CHO), 7.4-6.9 (9H, H<sub>Ar</sub>), 4.95 (s, 1H, H<sub>3</sub>), 4.45 (d,  $J$  = 8.9 Hz, 1H, H<sub>5</sub>), 4.01 (d, 1H, H<sub>5</sub>), 2.43 (s, 3H, *Me*-Ar), 0.95 ppm (s, 3H, Me). <sup>13</sup>C NMR (100.62 MHz, CDCl<sub>3</sub>, 25 °C):  $\delta$  = 200.56 (s, CHO), 150-115 (12C, C<sup>Ar</sup>), 73.15 (s, C<sup>5</sup>), 72.35 (s, C<sup>3</sup>), 63.05 (s, C<sup>4</sup>), 21.25 (s, *Me*-Ar), 15.47 ppm (s, Me). Enantiomeric excess was determined by <sup>1</sup>H NMR after the *in situ* formation of diastereomeric imines with (*R*)-(+)- $\alpha$ -methylbenzylamine (99%, Fluka). <sup>1</sup>H NMR (400.16 MHz, C<sub>6</sub>D<sub>6</sub>, RT): major isomer  $\delta$  = 5.00 (s, O-N-C<sup>3</sup>H), minor isomer  $\delta$  = 4.98 ppm (s, O-N-C<sup>3</sup>H).

***Endo*-4-methyl-2-*N*-phenyl-3-(4-trifluoromethyl-phenyl)-isoxazolidine-4-carbaldehyde<sup>5a,c</sup>**  
**(Table 2, Entry 16)**

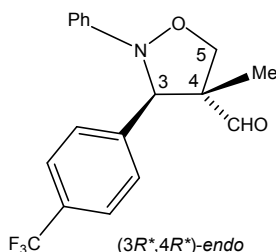

<sup>1</sup>H NMR (400.16 MHz, CDCl<sub>3</sub>, 25 °C):  $\delta$  = 9.70 (s, 1H, CHO), 7.7-6.9 (9H, H<sub>Ar</sub>), 5.08 (s, 1H, H<sub>3</sub>), 4.45 (d,  $J$  = 8.9 Hz, 1H, H<sub>5</sub>), 4.02 (d, 1H, H<sub>5</sub>), 0.92 ppm (s, 3H, Me). <sup>13</sup>C NMR (100.62 MHz, CDCl<sub>3</sub>, 25 °C):  $\delta$  = 199.82 (s, CHO), 150-114 (12C, C<sup>Ar</sup>), 124.18 (q,  $J_{\text{F-C}}$  = 272.0 Hz, CF<sub>3</sub>), 73.18 (s, C<sup>5</sup>), 71.78 (s, C<sup>3</sup>), 63.24 (s, C<sup>4</sup>), 15.53 ppm (s, Me). <sup>19</sup>F NMR (282.2 MHz, CDCl<sub>3</sub>, 25 °C):  $\delta$  = -62.28 ppm (s, CF<sub>3</sub>). Enantiomeric excess was determined by <sup>1</sup>H NMR after the *in situ* formation of diastereomeric imines with (*R*)-(+)- $\alpha$ -methylbenzylamine (99%, Fluka). <sup>1</sup>H NMR (400.16 MHz, C<sub>6</sub>D<sub>6</sub>, RT): major isomer  $\delta$  = 5.09 (s, O-N-C<sup>3</sup>H), minor isomer  $\delta$  = 4.98 ppm (s, O-N-C<sup>3</sup>H).

***Endo-5-methyl-2-N-phenyl-3-(4-trifluoromethyl-phenyl)-isoxazolidine-5-carbaldehyde*<sup>5a,c</sup> (Table 2, Entry 16)**

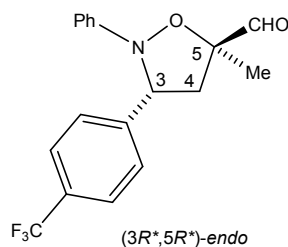

<sup>1</sup>H NMR (400.16 MHz, CDCl<sub>3</sub>, 25 °C):  $\delta$  = 9.65 (s, 1H, CHO), 7.7-6.9 (9H, H<sub>Ar</sub>), 4.94 (pt,  $J$  = 7.5 Hz, 1H, H<sub>3</sub>), 3.37 (dd,  $J$  = 8.2, 12.6 Hz, 1H, H<sub>4</sub>), 2.27 (dd,  $J$  = 6.8 Hz, 1H, H<sub>4</sub>), 1.52 ppm (s, 3H, Me). <sup>13</sup>C NMR (100.62 MHz, CDCl<sub>3</sub>, 25 °C):  $\delta$  = 200.75 (s, CHO), 150-114 (12C, C<sup>Ar</sup>), 124.22 (q,  $J_{F-C}$  = 272.0 Hz, CF<sub>3</sub>), 87.40 (s, C<sup>5</sup>), 67.93 (s, C<sup>3</sup>), 45.59 (s, C<sup>4</sup>), 18.56 ppm (s, Me). <sup>19</sup>F NMR (282 MHz, CDCl<sub>3</sub>, 25 °C):  $\delta$  = -62.32 ppm (s, CF<sub>3</sub>). Enantiomeric excess was determined by <sup>1</sup>H NMR after the *in situ* formation of diastereomeric imines with (*R*)-(+)- $\alpha$ -methylbenzylamine (99%, Fluka). <sup>1</sup>H NMR (400.16 MHz, C<sub>6</sub>D<sub>6</sub>, RT): major isomer  $\delta$  = 4.71 (pt, O-N-C<sup>3</sup>H), minor isomer  $\delta$  = 5.03 ppm (pt, O-N-C<sup>3</sup>H).

***Endo-4-methyl-2-N-phenyl-3-(4-nitro-phenyl)-isoxazolidine-4-carbaldehyde*<sup>5a</sup> (Table 2, Entry 17)**

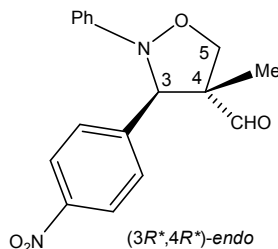

<sup>1</sup>H NMR (400.16 MHz, CDCl<sub>3</sub>, 25 °C):  $\delta$  = 9.69 (s, 1H, CHO), 8.4-6.8 (9H, H<sub>Ar</sub>), 5.07 (s, 1H, H<sub>3</sub>), 4.46 (d,  $J$  = 8.9 Hz, 1H, H<sub>5</sub>), 4.03 (d, 1H, H<sub>5</sub>), 0.92 ppm (s, 3H, Me). <sup>13</sup>C NMR (100.62 MHz, CDCl<sub>3</sub>, 25 °C):  $\delta$  = 199.39 (s, CHO), 149-114 (12C, C<sup>Ar</sup>), 73.34 (s, C<sup>5</sup>), 71.42 (s, C<sup>3</sup>), 63.39 (s, C<sup>4</sup>), 15.82 ppm (s, Me). Enantiomeric excess was determined by <sup>1</sup>H NMR after the *in situ* formation of diastereomeric imines with (*R*)-(+)- $\alpha$ -methylbenzylamine (99%, Fluka). <sup>1</sup>H NMR (400.16 MHz, C<sub>6</sub>D<sub>6</sub>, RT): major isomer  $\delta$  = 5.12 (s, O-N-C<sup>3</sup>H), minor isomer  $\delta$  = 4.97 ppm (s, O-N-C<sup>3</sup>H).

**Endo-5-methyl-2-*N*-phenyl-3-(4-nitro-phenyl)-isoxazolidine-5-carbaldehyde<sup>5a</sup>**  
(Table 2, Entry 17)

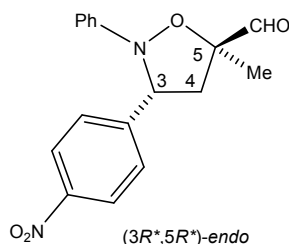

<sup>1</sup>H NMR (400.16 MHz, CDCl<sub>3</sub>, 25 °C):  $\delta$  = 9.66 (d,  $J$  = 0.9 Hz, 1H, CHO), 8.4-6.8 (9H, H<sub>Ar</sub>), 4.94 (pt,  $J$  = 6.7 Hz, 1H, H<sub>3</sub>), 3.39 (dd,  $J$  = 8.3, 12.6 Hz, 1H, H<sub>4</sub>), 2.24 (dd,  $J$  = 6.6 Hz, 1H, H<sub>4</sub>), 1.51 ppm (s, 3H, Me). <sup>13</sup>C NMR (100.62 MHz, CDCl<sub>3</sub>, 25 °C):  $\delta$  = 200.76 (s, CHO), 149-114 (12C, C<sup>Ar</sup>), 87.32 (s, C<sup>5</sup>), 67.47 (s, C<sup>3</sup>), 45.45 (s, C<sup>4</sup>), 18.61 ppm (s, Me). Enantiomeric excess was determined by <sup>1</sup>H NMR after the *in situ* formation of diastereomeric imines with (*R*)-(+)- $\alpha$ -methylbenzylamine (99%, Fluka). <sup>1</sup>H NMR (400.16 MHz, C<sub>6</sub>D<sub>6</sub>, RT): major isomer  $\delta$  = 4.68 (pt, O-N-C<sup>3</sup>H), minor isomer  $\delta$  = 5.01 ppm (pt, O-N-C<sup>3</sup>H).

**(3,4)-endo-2,3-diphenylisoxazolidine-4-carbaldehyde<sup>6b</sup>** (Table 3, Entries 1-4)

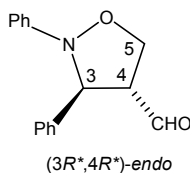

The oily residue was purified by column chromatography over silica gel with hexane/AcOEt (7/3, v/v) to provide the title compound as an oil. <sup>1</sup>H NMR (400.16 MHz, CD<sub>2</sub>Cl<sub>2</sub>, 25 °C):  $\delta$  = 9.70 (d,  $J$  = 1.5 Hz, 1H, CHO), 7.5-6.8 (m, 10H, H<sub>Ar</sub>), 4.99 (d,  $J$  = 4.6 Hz, 1H, H<sub>3</sub>), 4.42 (m, 2H, H<sub>5</sub>), 3.53 ppm (m, 1H, H<sub>4</sub>). <sup>13</sup>C NMR (75.47 MHz, CDCl<sub>3</sub>, 25 °C):  $\delta$  = 197.98 (CHO), 150-115 (12C, C<sup>Ar</sup>), 70.04 (C<sup>3</sup>), 66.33 (C<sup>4</sup>), 65.59 ppm (C<sup>5</sup>). Enantiomeric excess was determined by HPLC analysis of the primary alcohol obtained by NaBH<sub>4</sub> reduction of the aldehyde, using a Chiracel OD-H column (*n*-hexane/2-propanol: 95/5, 0.5 mL/min); major isomer:  $t_r$  = 18.2 min. and minor isomer:  $t_r$  = 28.4 min.



**(3*S*,4*R*,5*S*)-endo-5-methyl-2,3-diphenylisoxazolidine-4-carbaldehyde<sup>6b</sup> (Table 3, Entries 5-8)**

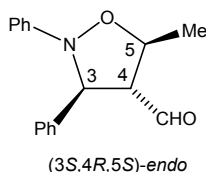

The oily residue was purified by column chromatography over silica gel with hexane/AcOEt (7/3, v/v) to provide the title compound as an oil. <sup>1</sup>H NMR (400.16 MHz, CD<sub>2</sub>Cl<sub>2</sub>, 25 °C): δ = 9.63 (d, *J* = 2.5 Hz, 1H, CHO), 7.4-6.8 (m, 10H, H<sub>Ar</sub>), 5.01 (d, *J* = 6.3 Hz, 1H, H<sub>3</sub>), 4.43 (dq, *J* = 8.6, 6.1 Hz, 1H, H<sub>5</sub>), 3.15 (m, 1H, H<sub>4</sub>), 1.45 ppm (s, 3H, Me). <sup>13</sup>C NMR (100.62 MHz, CDCl<sub>3</sub>, 25 °C): δ = 197.67 (CHO), 151.2-114.1 (12C, C<sub>Ar</sub>), 75.37 (C<sup>5</sup>), 72.90 (C<sup>4</sup>), 71.41 (C<sup>3</sup>), 17.84 ppm (Me). Enantiomeric excess was determined by HPLC analysis of the primary alcohol obtained by NaBH<sub>4</sub> reduction of the aldehyde, using a Chiracel OD-H column (*n*-hexane/2-propanol: 95/5, 1 mL/min); major isomer: *t*<sub>r</sub> = 13.7 min. and minor isomer: *t*<sub>r</sub> = 20.9 min.

**(3,4)-endo-5-methyl-2,3-diphenylisoxazolidine-4-methyl-4-carbaldehyde<sup>6b</sup> (Table 3, Entries 9, 10)**

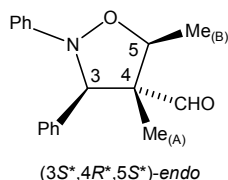

The oily residue was purified by column chromatography over silica gel with hexane/AcOEt (7/3, v/v) to provide the title compound as an oil. <sup>1</sup>H NMR (400.16 MHz, CD<sub>2</sub>Cl<sub>2</sub>, 25 °C): δ = 9.57 (s, 1H, CHO), 7.4-6.8 (m, 10H, H<sub>Ar</sub>), 5.01 (s, 1H, H<sub>3</sub>), 4.42 (q, *J* = 6.3 Hz, 1H, H<sub>5</sub>), 1.23 (s, 3H, Me<sub>(B)</sub>), 0.80 ppm (s, 3H, Me<sub>(A)</sub>). <sup>13</sup>C NMR (100.62 MHz, CDCl<sub>3</sub>, 25 °C): δ = 200.45 (CHO), 152-113 (12C, C<sub>Ar</sub>), 77.75 (C<sup>3</sup>), 75.53 (C<sup>5</sup>), 65.76 (C<sup>4</sup>), 12.79 (Me<sub>(A)</sub>), 11.06 ppm (Me<sub>(B)</sub>). Enantiomeric excess was determined by HPLC analysis of the primary alcohol obtained by NaBH<sub>4</sub> reduction of the aldehyde, using a Chiracel OD-H column (*n*-hexane/2-propanol: 95/5, 0.75 mL/min); major isomer: *t*<sub>r</sub> = 13.8 min. and minor isomer: *t*<sub>r</sub> = 29.5 min.

#### 4. References

1. L. Tian, G.-Y. Xu, Y. Ye and L. Liu, *Synth.* 2003, 1329-1334.
2. K. S. Chan, M. L. Yeung, W. Chan, R. Wang and T. C. W. Mak, *J. Org Chem.* 1995, **60**, 1741-1747.
3. S.-I. Murahashi, H. Mitsui, T. Shiota, T. Tsuda and S. Watanabe, *J. Org Chem.* 1990, **55**, 1736-1744.
4. D. Carmona, F. Viguri, A. Asenjo, M. P. Lamata, F. J. Lahoz, P. García-Orduña and L. A. Oro, *Organometallics* 2011, **30**, 6661-6673.
5. (a) F. Viton, G. Bernardinelli and E. P. Kündig, *J. Am. Chem. Soc.* 2002, **124**, 4968-4969; (b) A. Bădoiu, G. Bernardinelli, J. Mareda, E. P. Kündig and F. Viton, *Chem. Asian J.* 2008, **3**, 1298; (c) X. Wang, C. Weigl and M. P. Doyle, *J. Am. Chem. Soc.* 2011, **133**, 9572; (d) A. Badoiu, G. Bernardinelli and E. P. Kündig, *Synthesis* 2010, 2207-2212.
6. (a) D. Carmona, M. P. Lamata, F. Viguri, R. Rodríguez, L. A. Oro, F. J. Lahoz, A. I. Balana, T. Tejero and P. Merino, *J. Am. Chem. Soc.* 2005, **127**, 13386-13398; (b) D. Carmona, M. P. Lamata, F. Viguri, R. Rodríguez, T. Fischer, F. J. Lahoz, I. T. Dobrinovitch and L. A. Oro, *Adv. Synth. Catal.* 2007, **349**, 1751-1758.

## 5. $^1\text{H}$ and $^{13}\text{C}$ NMR Spectra and Chromatograms of the Adducts

Mixture of (3,4)-*endo*-4-methyl-2-*N*,3-diphenylisoxazolidine-4-carbaldehyde/(3,5)-*endo*-4-methyl-2-*N*,3-diphenylisoxazolidine-5-carbaldehyde: 1/5 molar ratio (Table 1, Entries 1-10)

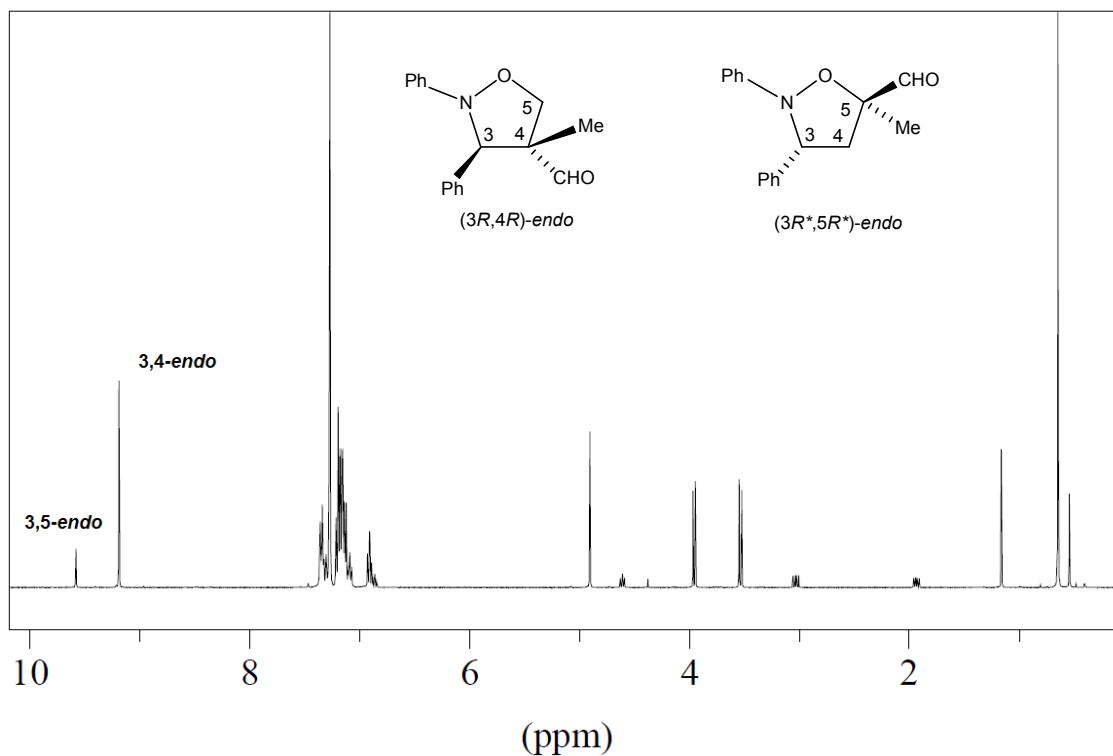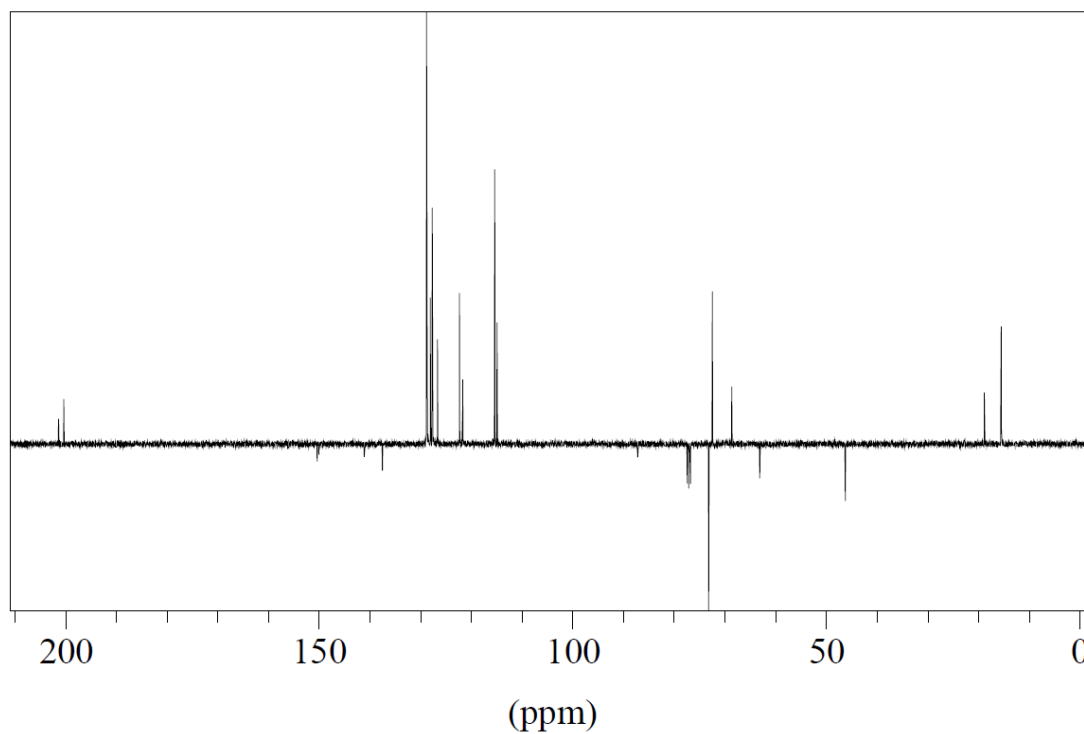

**Ee (3,4)-endo**

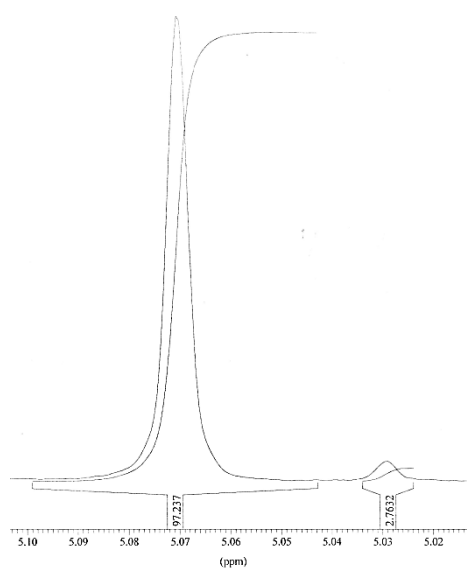

**Ee (3,5)-endo**

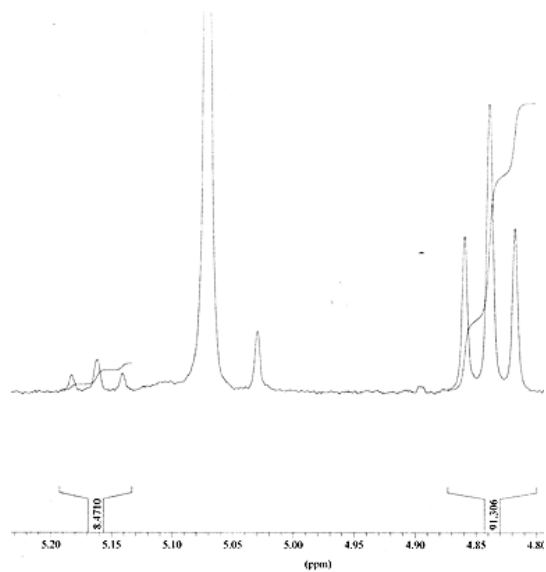

**(3,5)-endo-2-methyl-1,5,6,10*b*-tetrahydro-2*H*-isoxazolo[3,2*a*]isoquinoline-2-carbaldehyde (Table 1, Entries 11-20)**

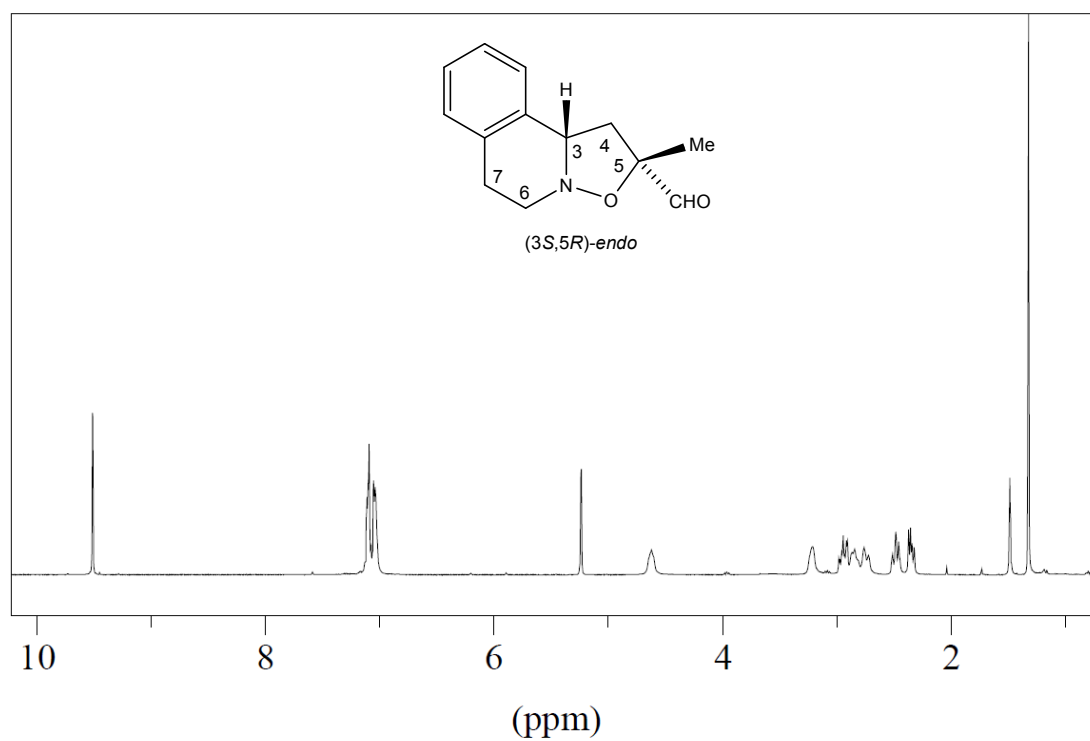

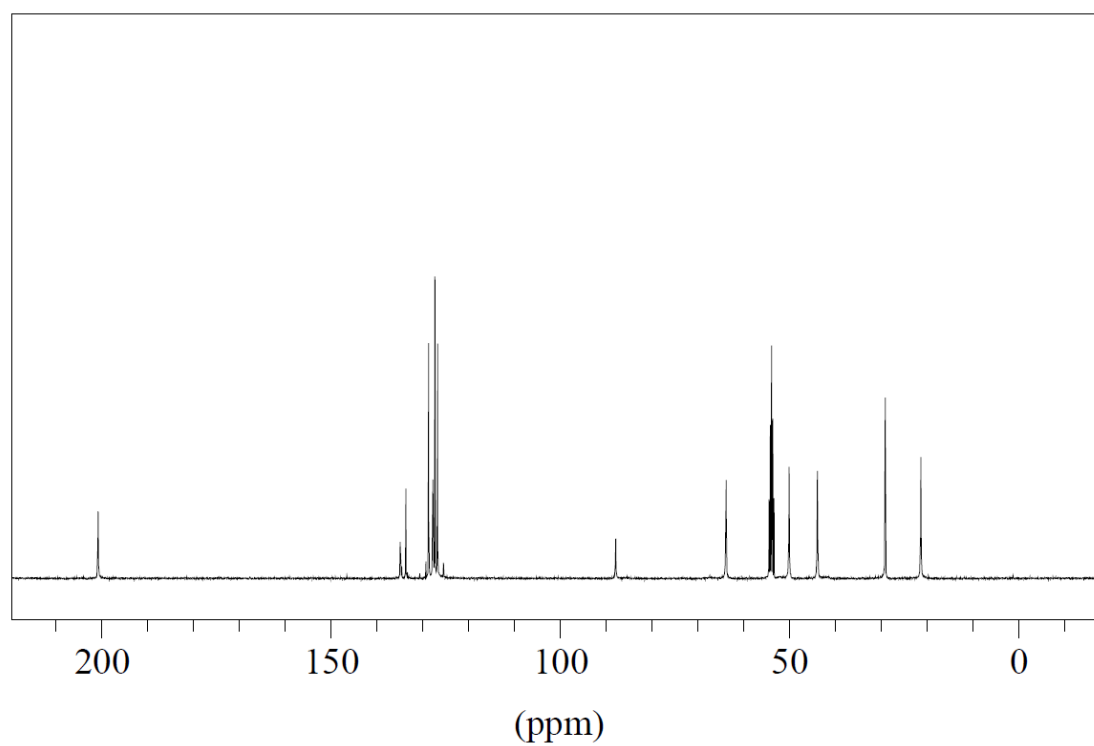

**Ee (3,5)-endo**

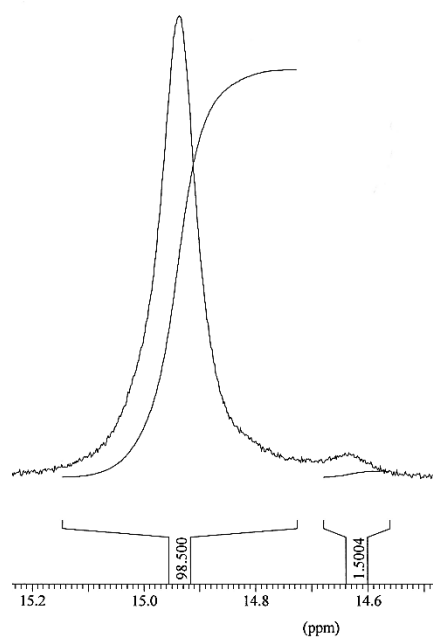

**(3,5)-endo-5-methyl-2-N-methyl-3-phenylisoxazolidine-5-carbaldehyde (Table 2, Entries 1-4)**

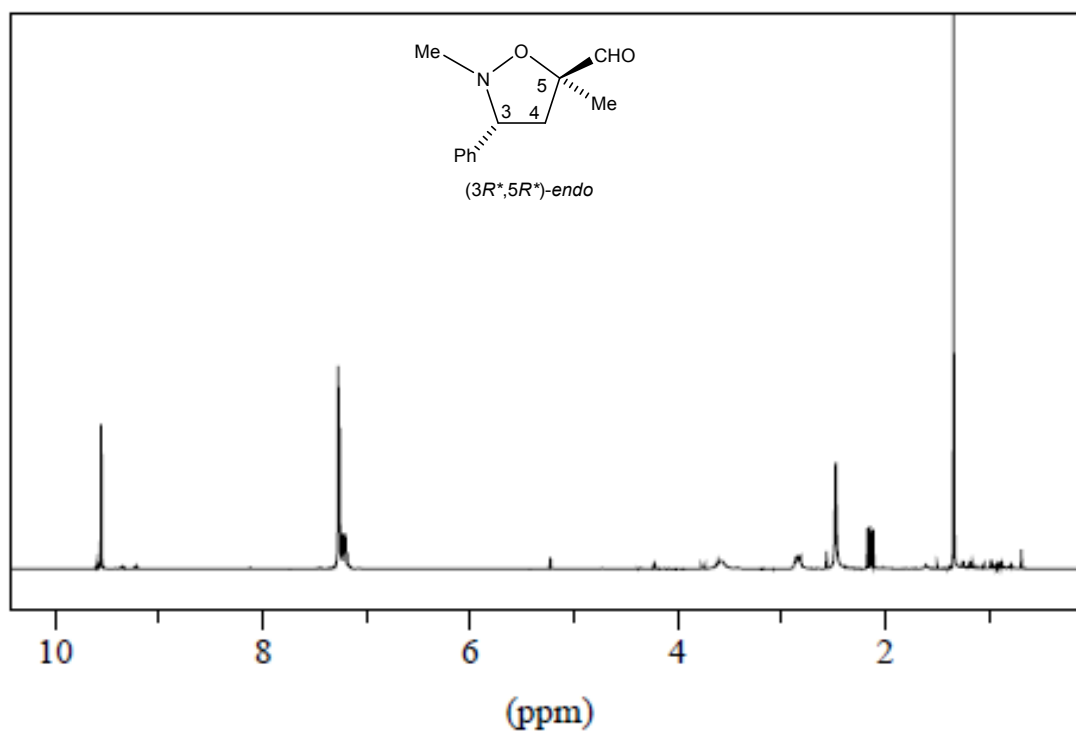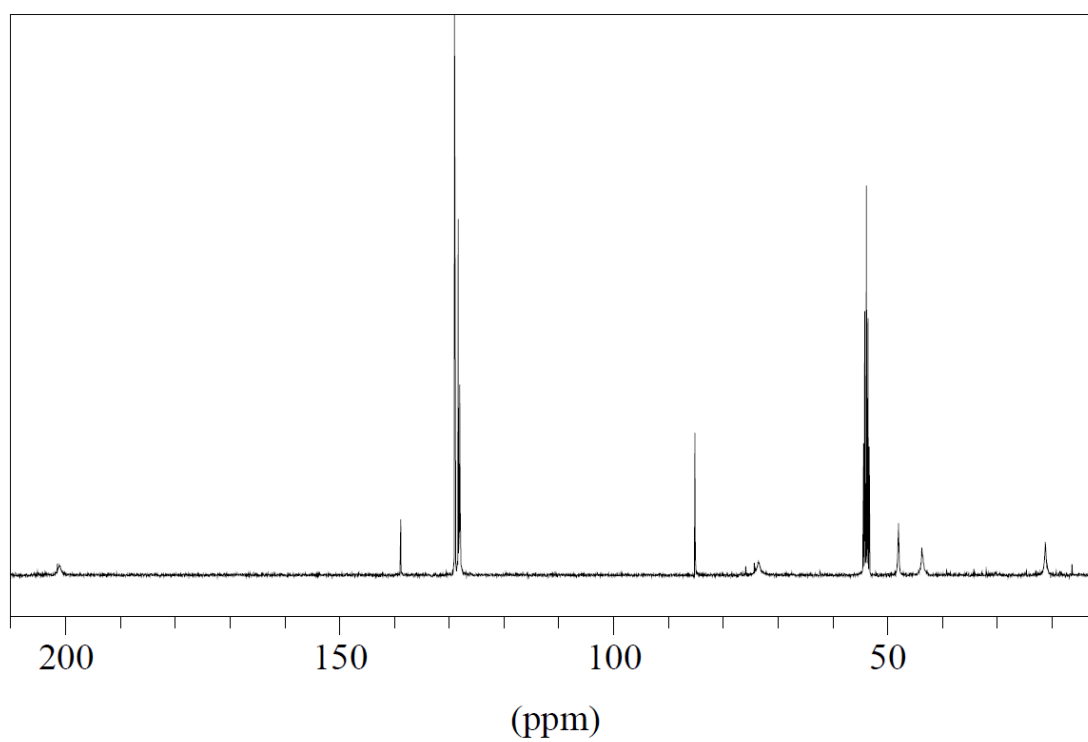

**Ee (3,5)-endo**

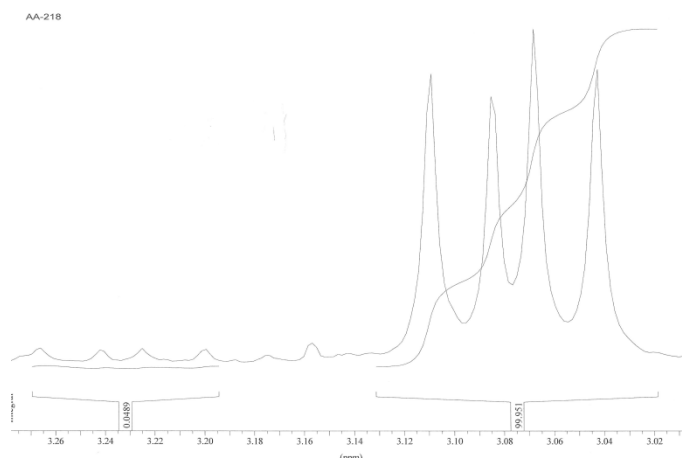

**(3*R*,5*R*)-endo-hexahydropyrrolo[1,2*b*]isoxazolo-2-carbaldehyde (Table 2, Entries 5-8)**

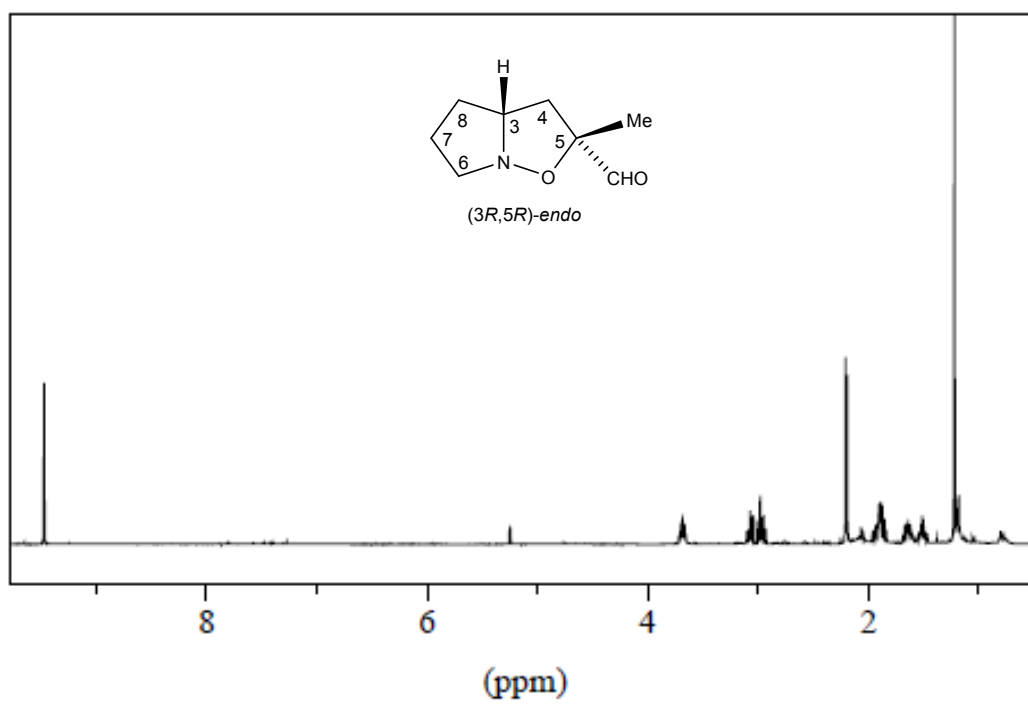

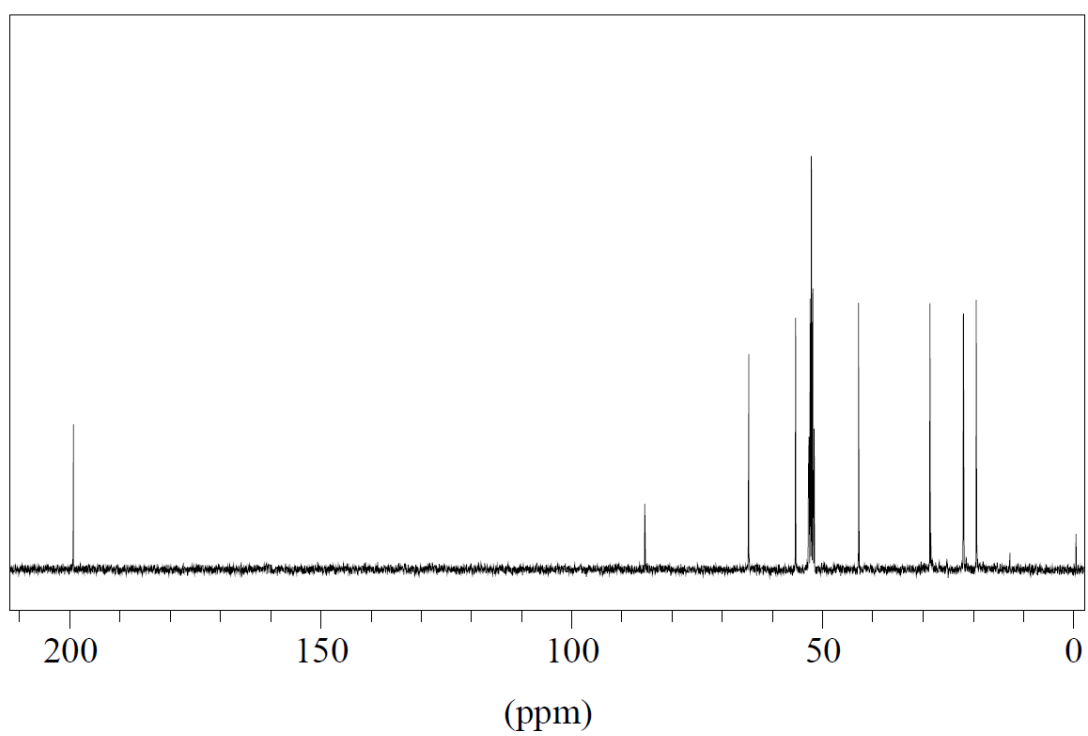

**Ee (3,5)-endo**

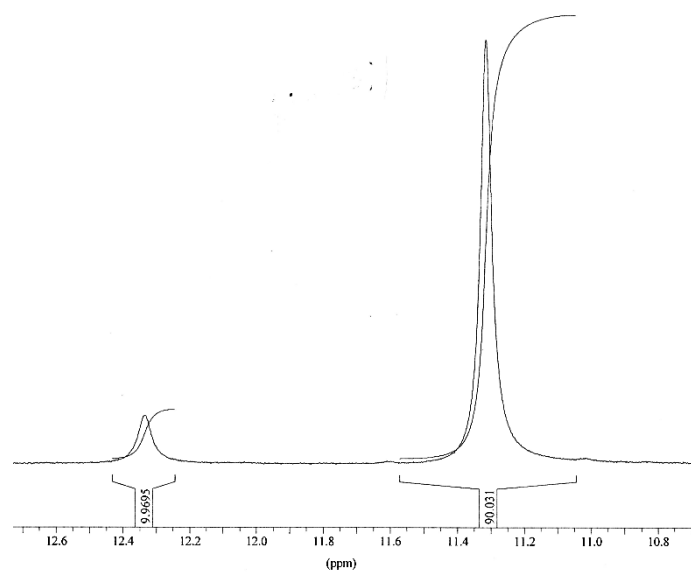



**(3*R*,5*R*)-endo-hexahydroisoxazolo[2,3*a*]pyridine-2-carbaldehyde (Table 2, Entries 9-12)**

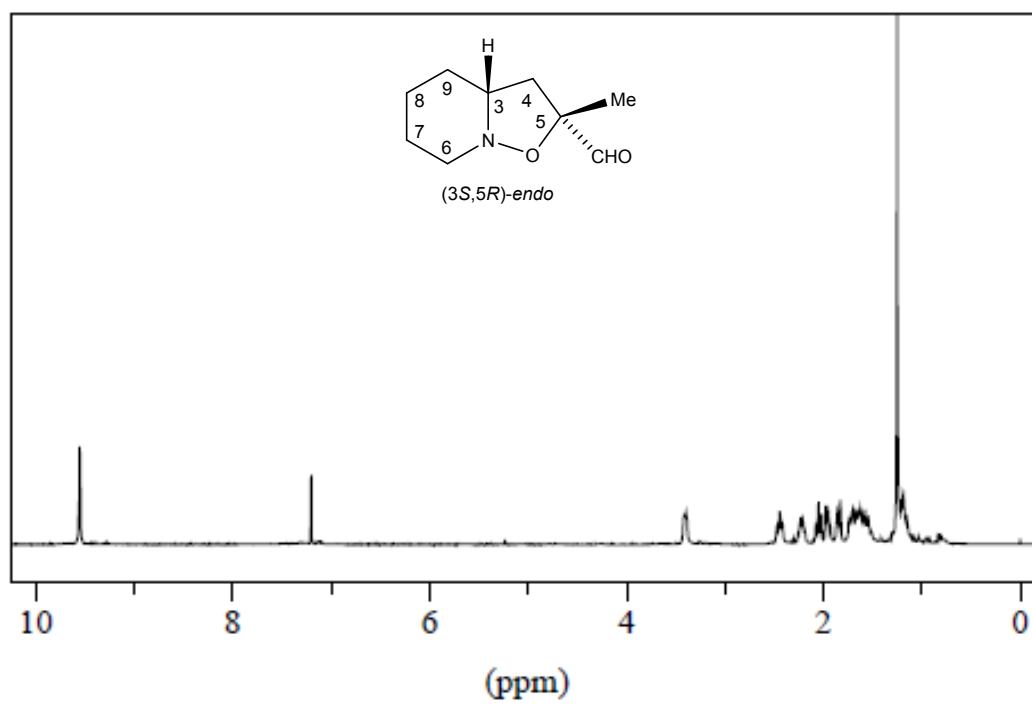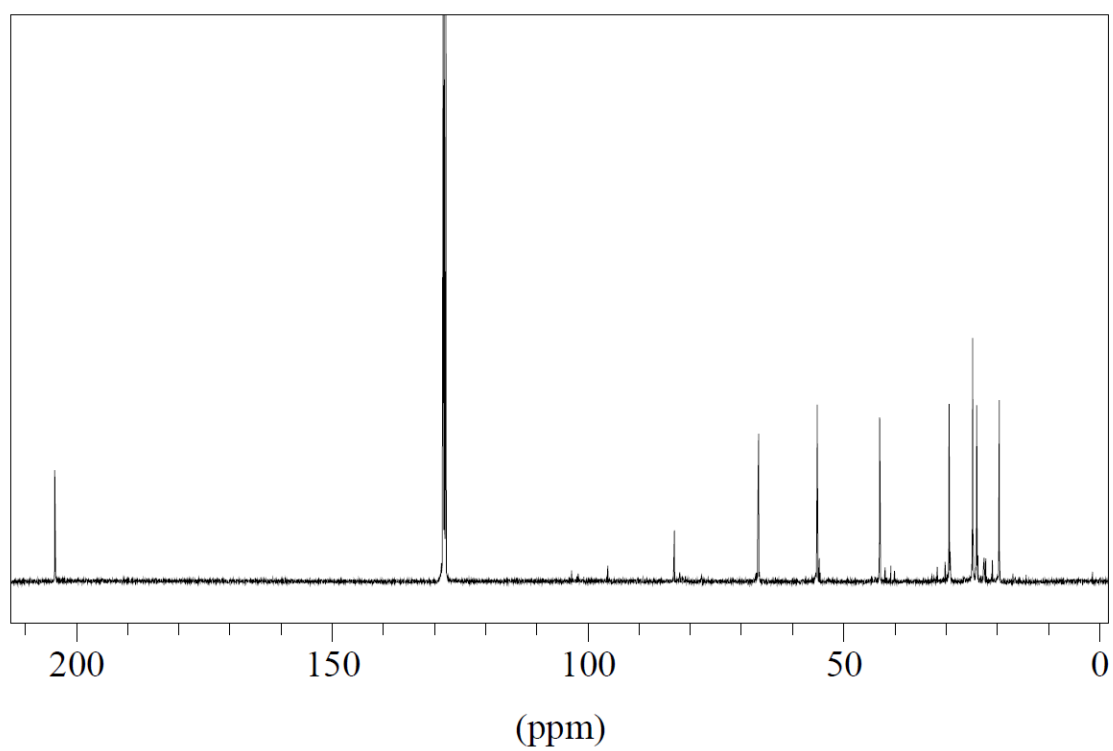

**Ee (3,5)-endo**

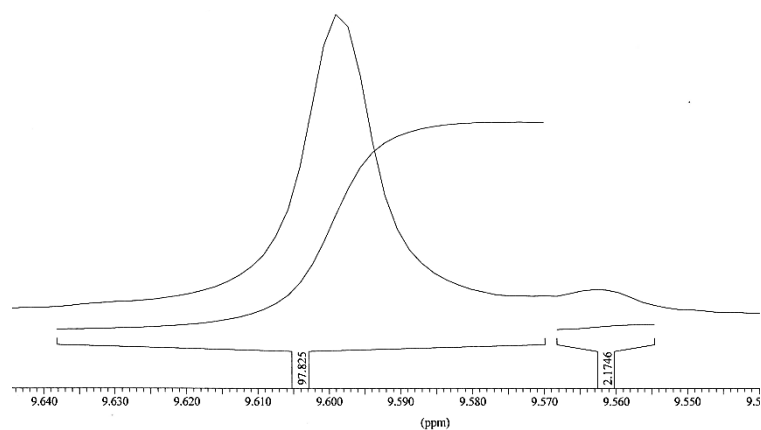

**(3,4)-endo-4-methyl-2-N-phenyl-3-(4-methoxyphenyl)-isoxazolidine-4-carbaldehyde (Table 2, Entry 13)**

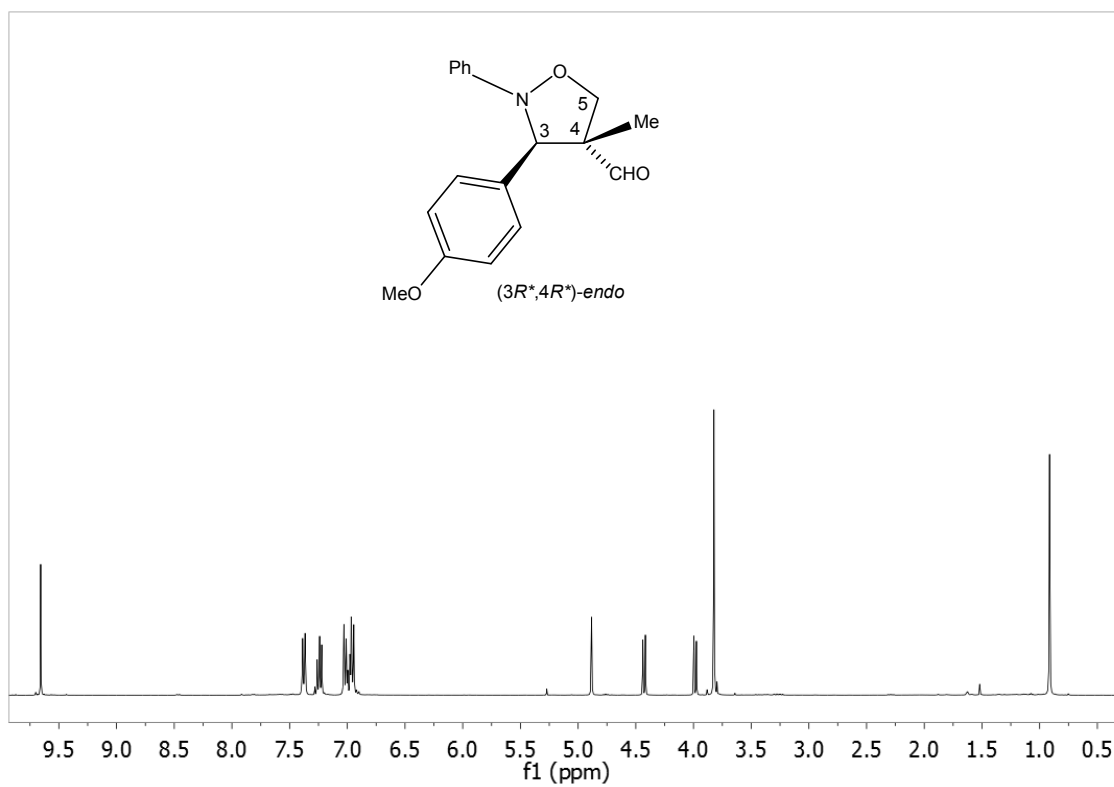

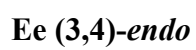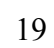

**(3,4)-*endo*-4-methyl-2-*N*-phenyl-3-(4-methylphenyl)-isoxazolidine-4-carbaldehyde**  
**(Table 2, Entry 14)**

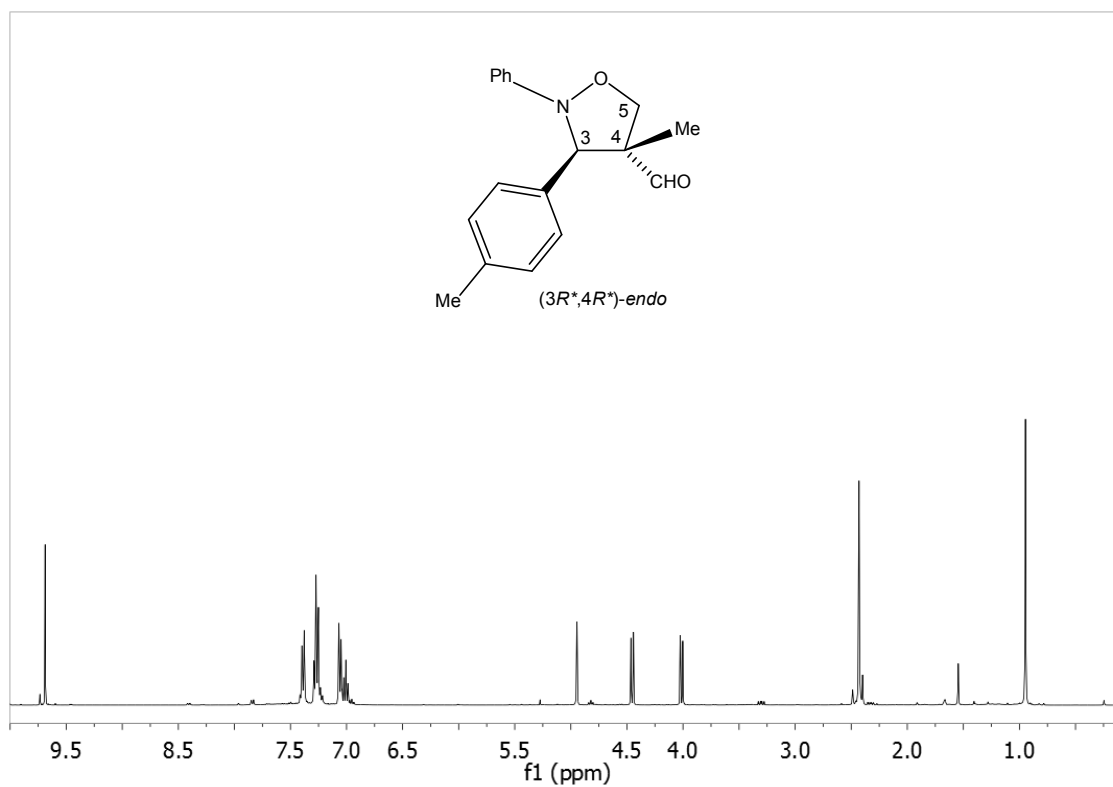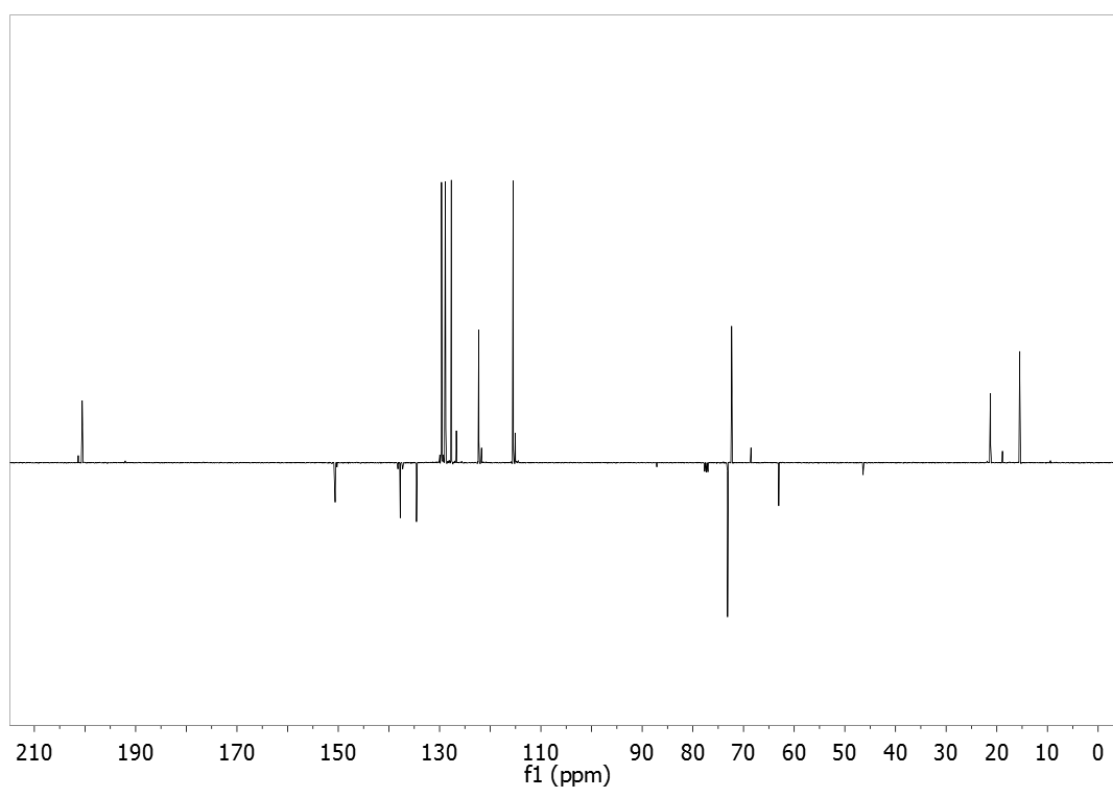

**Ee (3,4)-endo**

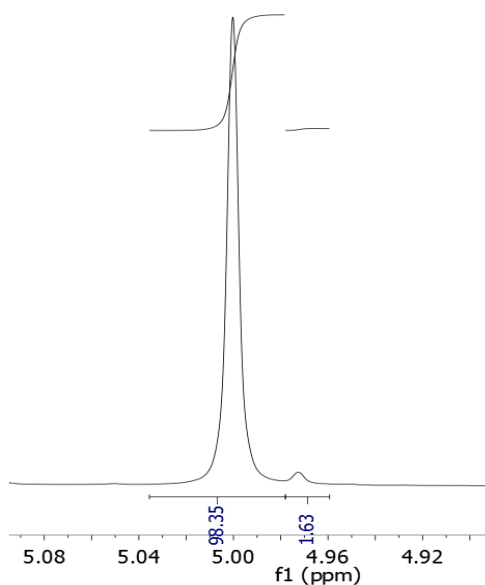

**Mixture of (3,4)-endo-4-methyl-2-N-phenyl-3-(4-trifluoromethylphenyl)-isoxazolidine-4-carbaldehyde and (3,5)-endo-5-methyl-2-N-phenyl-3-(4-trifluoromethylphenyl)-isoxazolidine-5-carbaldehyde (Table 2, Entry 16): 46/54 molar ratio**

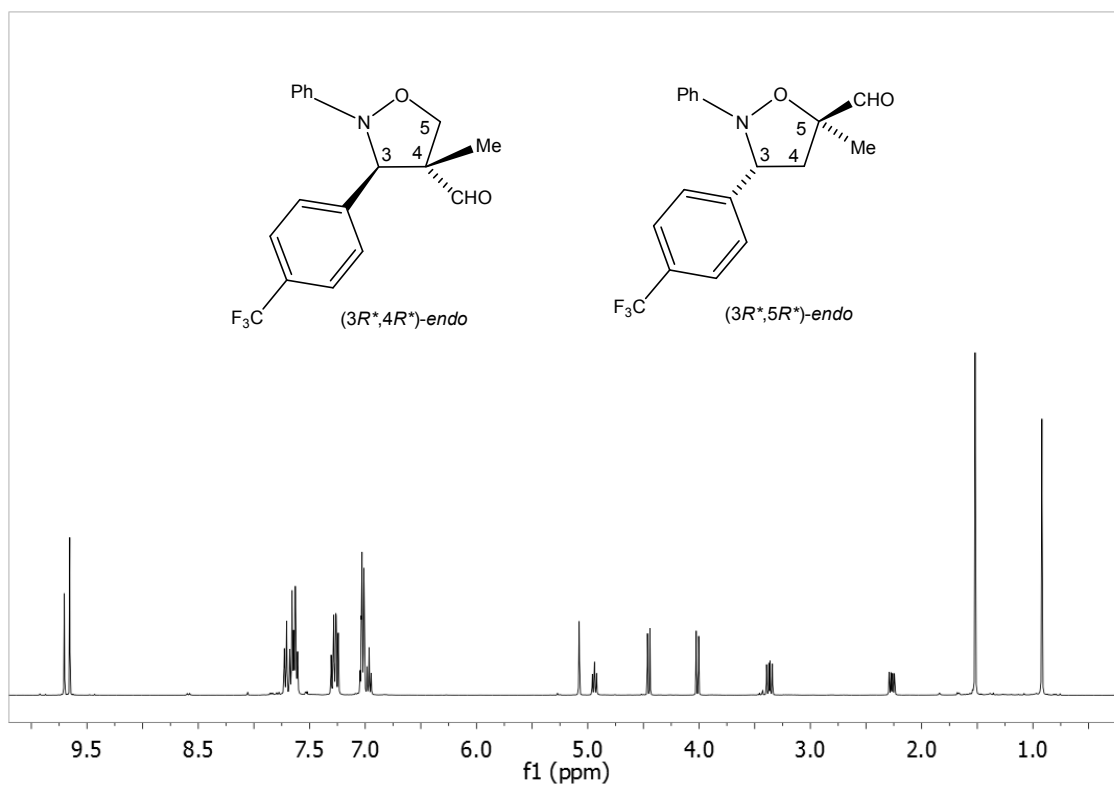

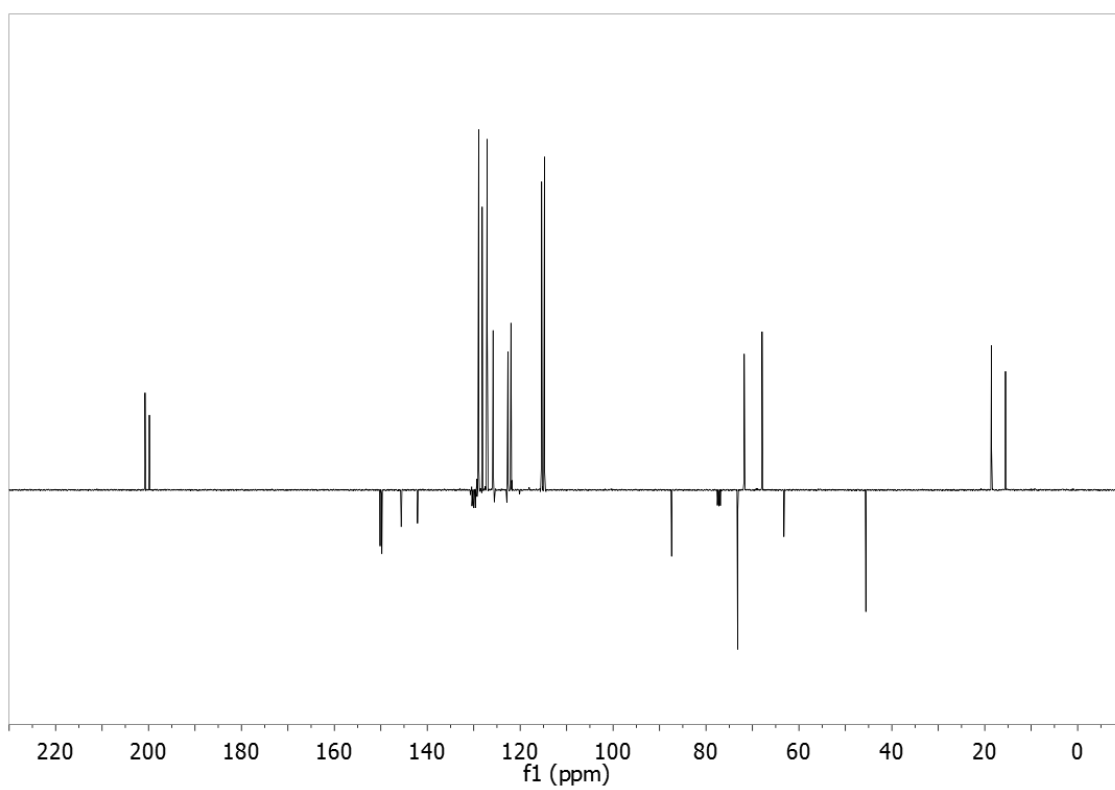

**Ee (3,4)-endo**

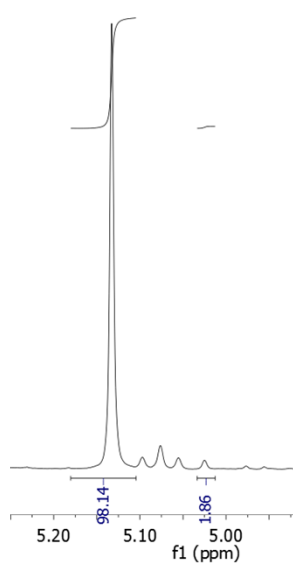

**Ee (3,5)-endo**

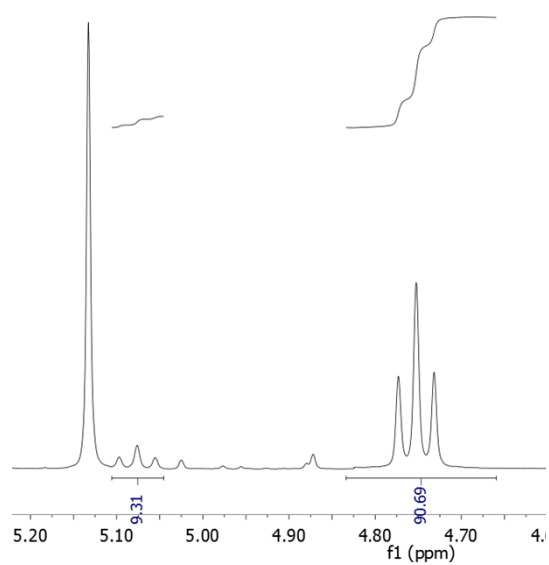

Mixture of (3,4)-*endo*-4-methyl-2-*N*-phenyl-3-(4-nitro-phenyl)-isoxazolidine-4-carbaldehyde and (3,5)-*endo*-5-methyl-2-*N*-phenyl-3-(4-nitro-phenyl)-isoxazolidine-5-carbaldehyde (Table 2, Entry 17): 30/70 molar ratio

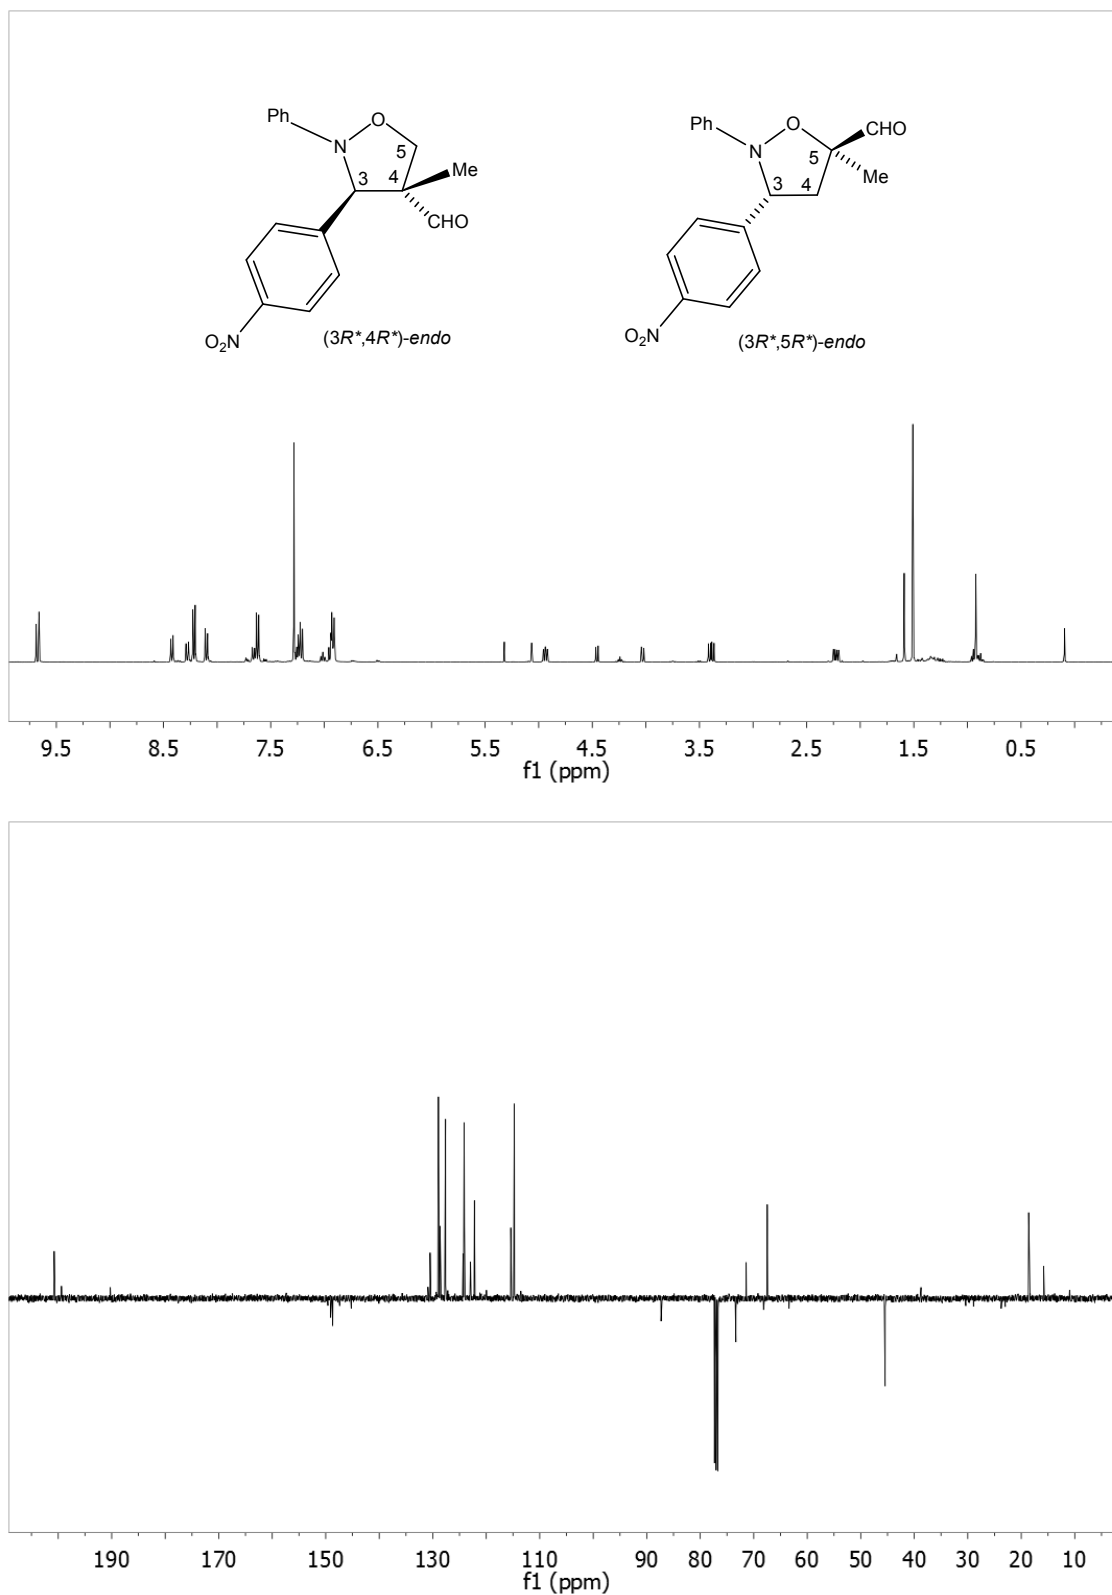

**Ee (3,4)-endo**

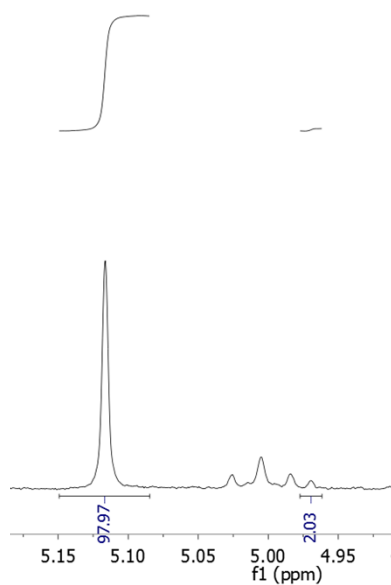

**Ee (3,5)-endo**

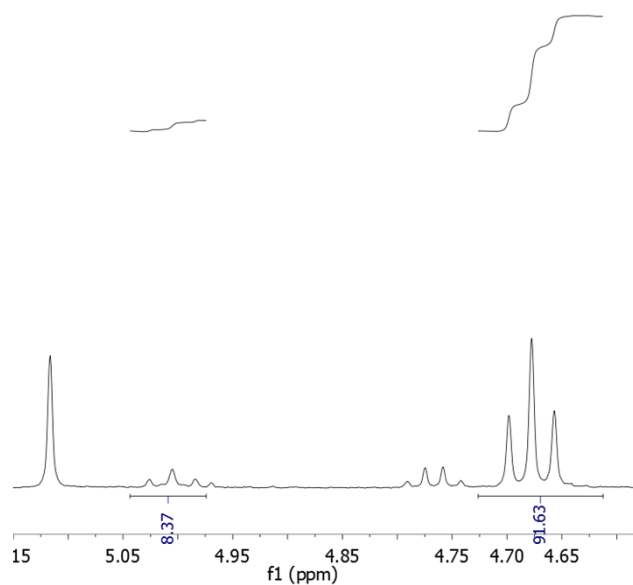

**(3,4)-endo-2,3-diphenylisoxazolidine-4-carbaldehyde (Table 3, Entries 1-4)**

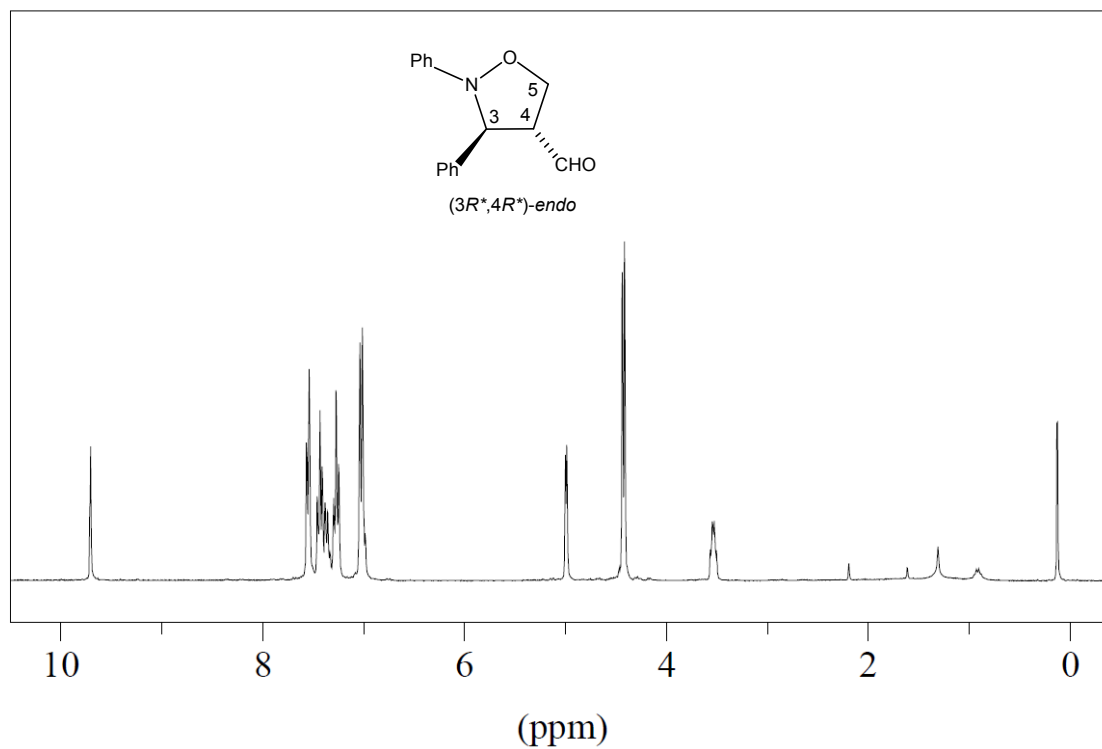



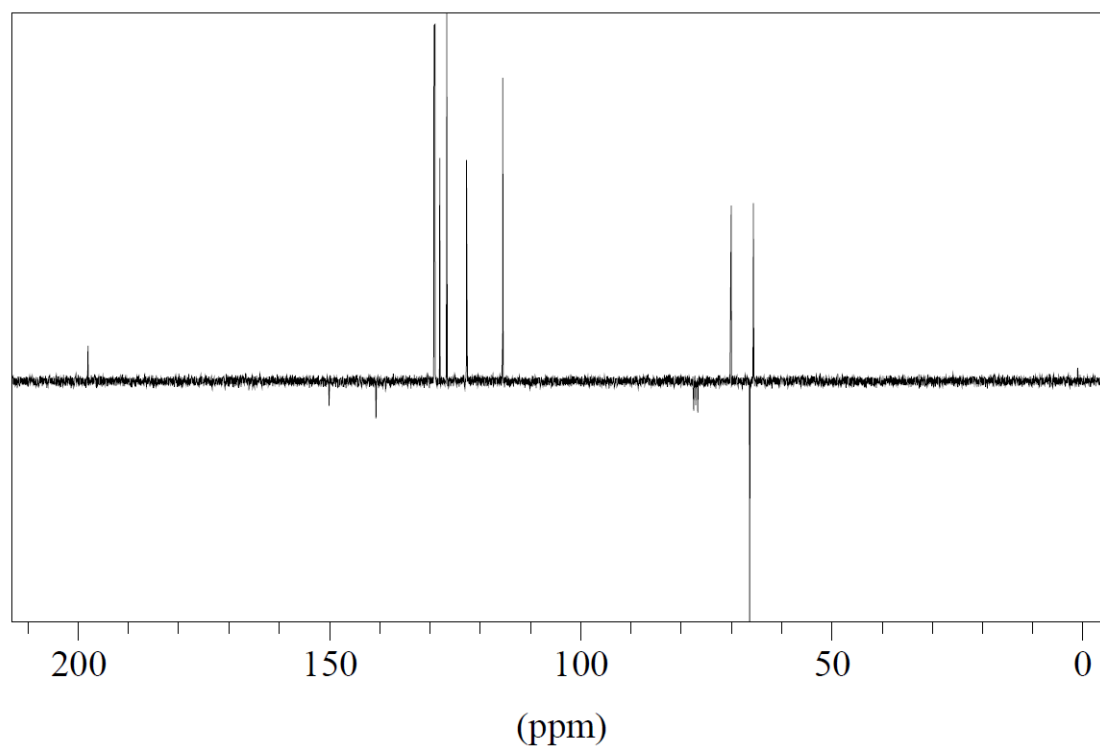

### Ee 3,4-endo

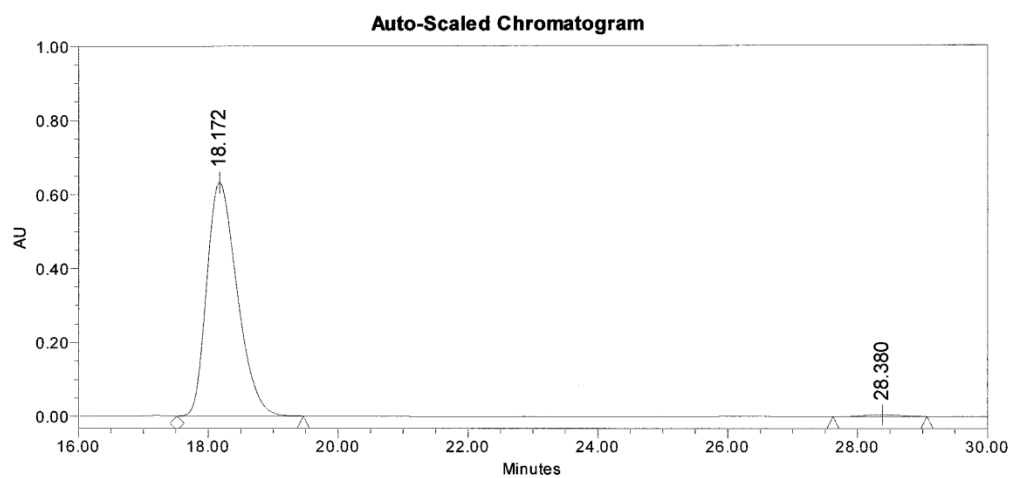

#### Peak Results

|   | Name | RT     | Area     | Height | % Area | Purity1<br>Angle | Purity1<br>Threshold |
|---|------|--------|----------|--------|--------|------------------|----------------------|
| 1 |      | 18.172 | 20482085 | 633071 | 99.08  | 2.106            | 4.679                |
| 2 |      | 28.380 | 189818   | 4677   | 0.92   | 3.424            | 10.237               |

**(3*R*,4*R*,5*S*)-endo-5-methyl-2,3-diphenylisoxazolidine-4-carbaldehyde (Table 3, Entries 5-8)**

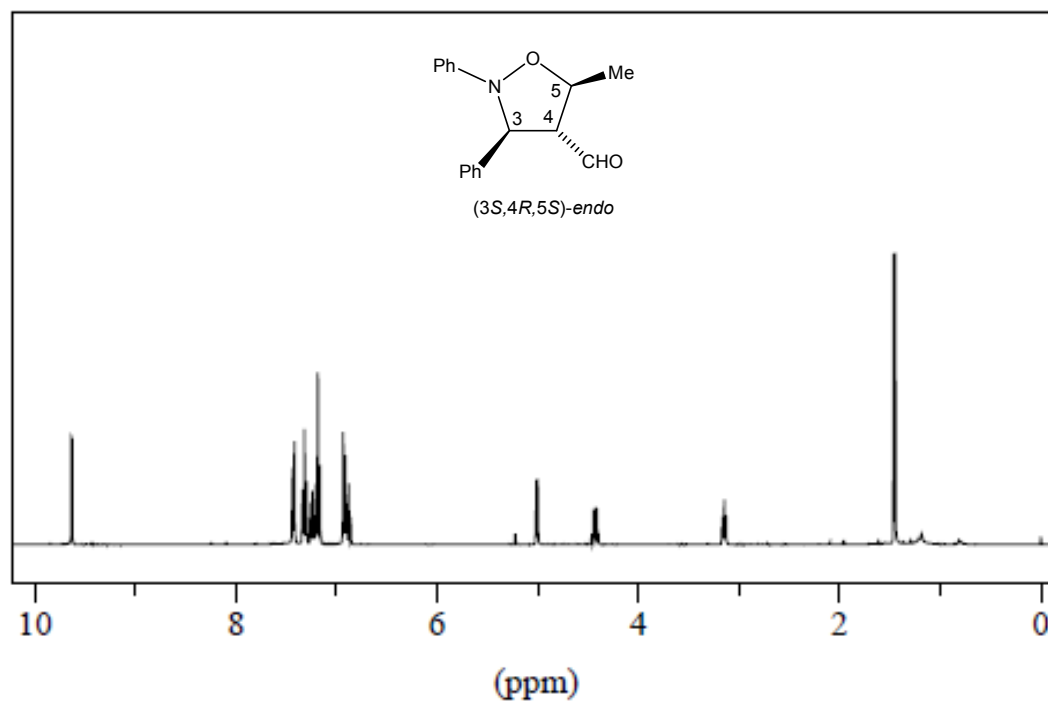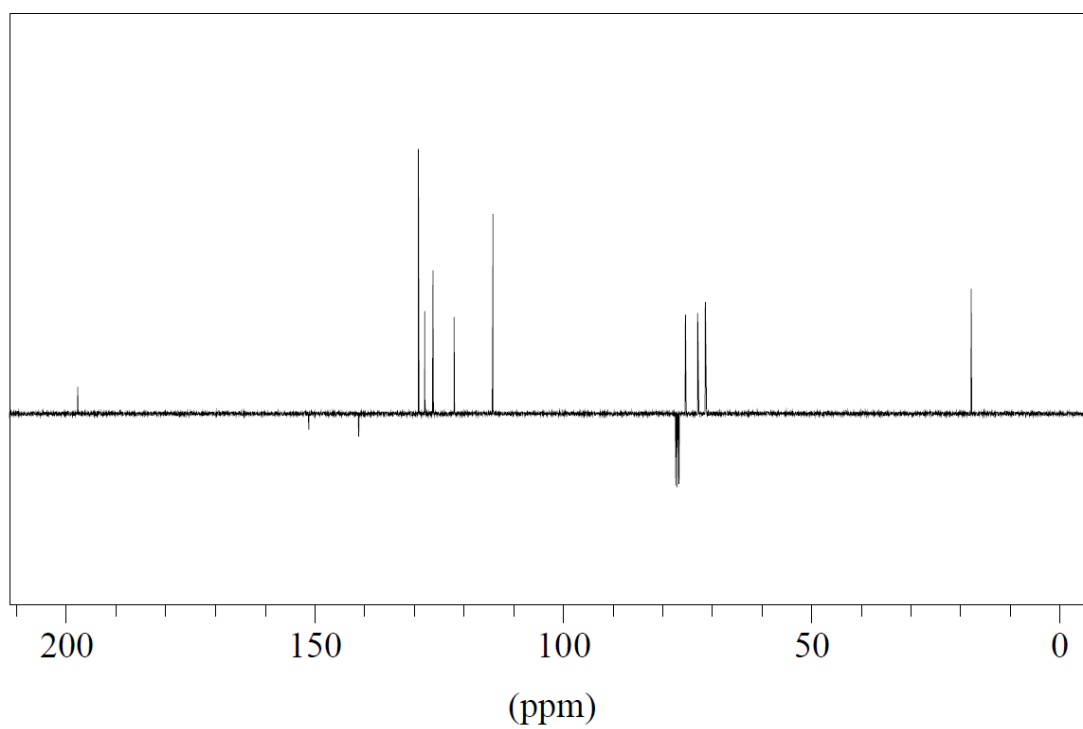

### Ee 3,4-*endo*

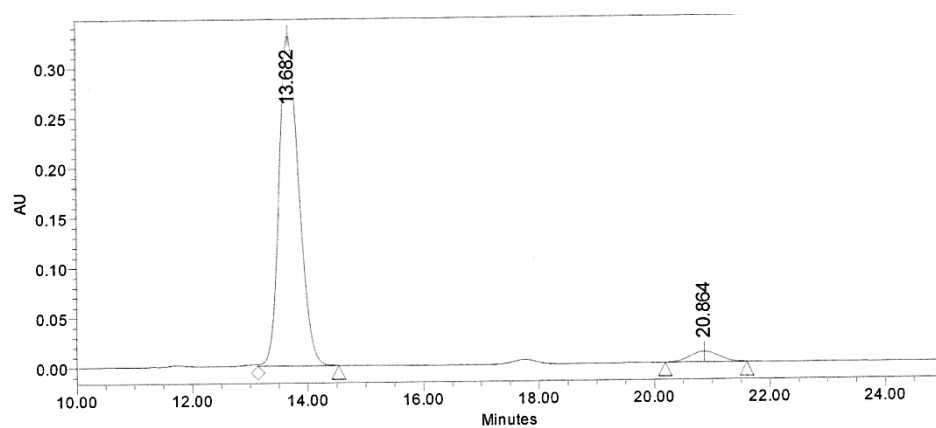

Peak Results

|   | Name | RT     | Area    | Height | % Area | Purity1<br>Angle | Purity1<br>Threshold |
|---|------|--------|---------|--------|--------|------------------|----------------------|
| 1 |      | 13.682 | 7849118 | 330563 | 95.46  | 0.316            | 0.300                |
| 2 |      | 20.864 | 373323  | 10659  | 4.54   | 0.559            | 0.968                |

(3,4)-*endo*-5-methyl-2,3-diphenylisoxazolidine-4-methyl-4-carbaldehyde (Table 3, Entries 9, 10)

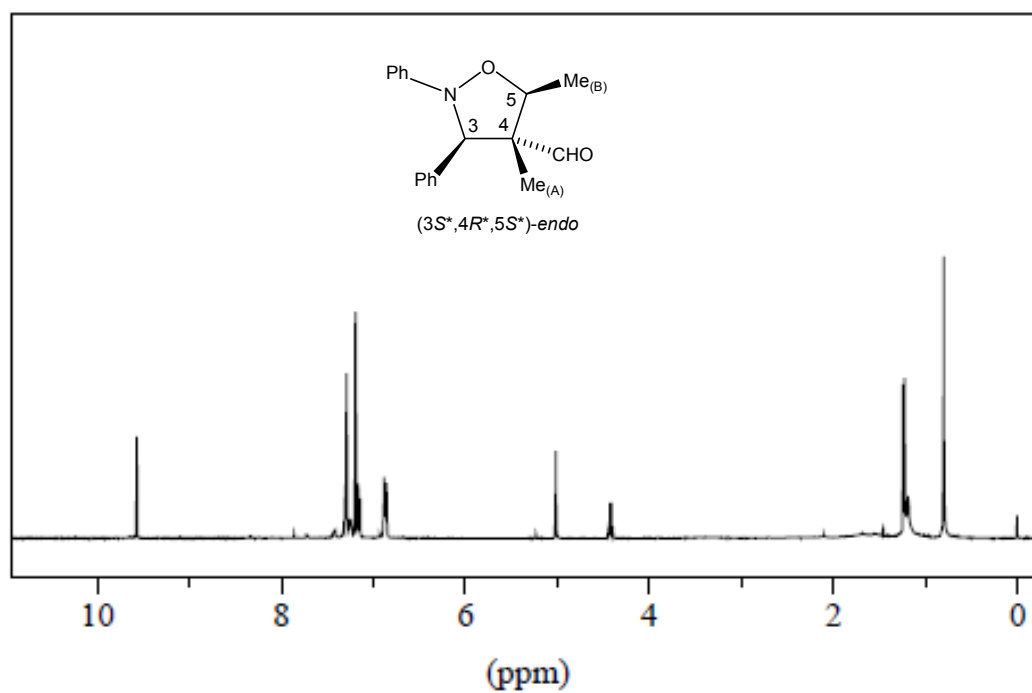

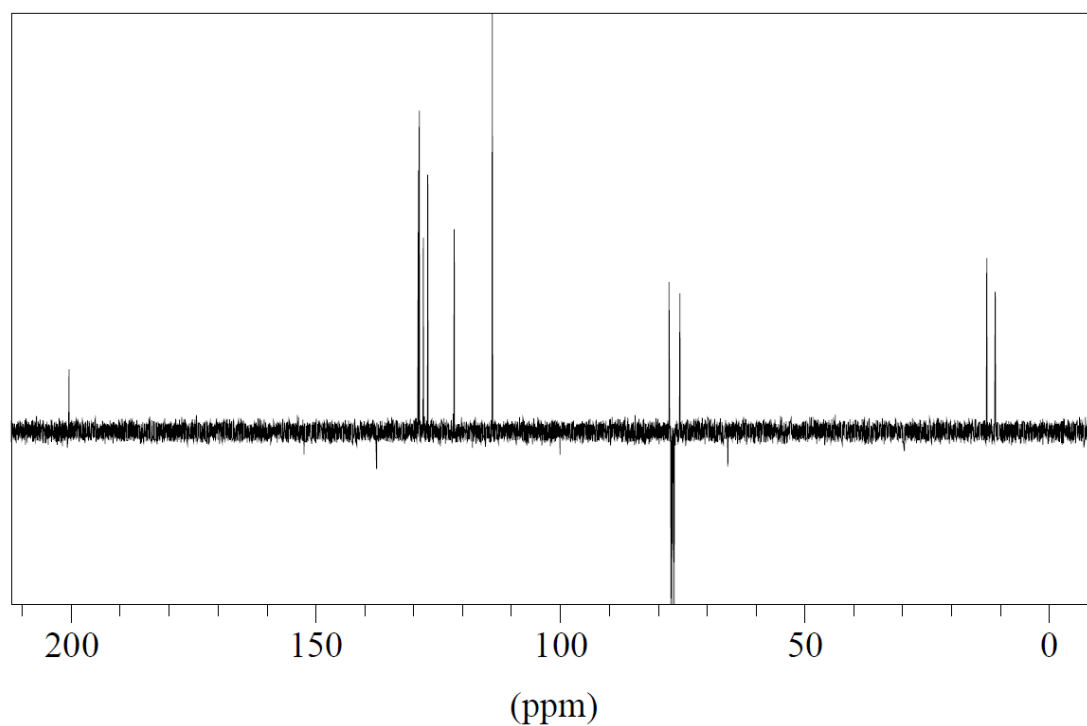

### Ee 3,4-endo

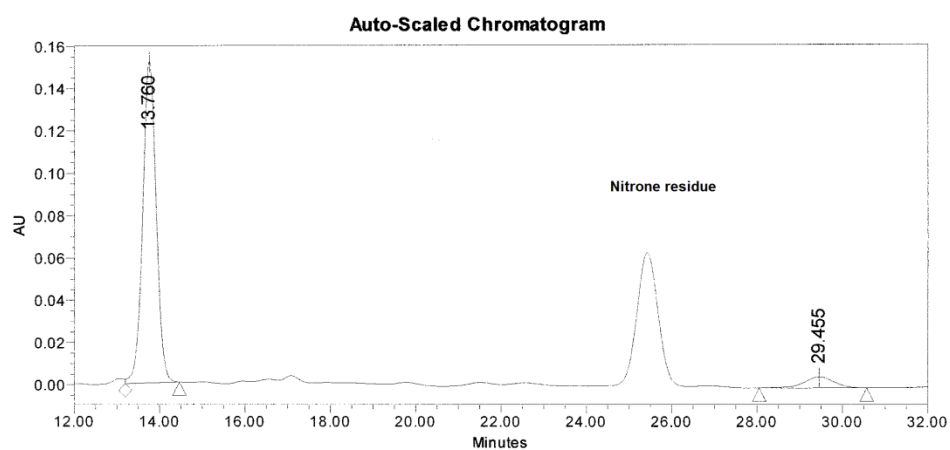

#### Peak Results

|   | Name | RT     | Area    | Height | % Area | Purity1 Angle | Purity1 Threshold |
|---|------|--------|---------|--------|--------|---------------|-------------------|
| 1 |      | 13.760 | 3339167 | 151860 | 92.82  | 5.194         | 22.466            |
| 2 |      | 29.455 | 258238  | 5224   | 7.18   | 60.078        | 90.000            |
